# Supplementary material for: Hematopoietic Protein-1 Regulates the Actin Membrane Skeleton and Membrane Stability in Murine Erythrocytes
Source: PLoS One. 2013 Feb 12;8(2):e54902. doi: 10.1371/journal.pone.0054902 (PMC3570531; doi:10.1371/journal.pone.0054902)
Supplement: Table S2 — Proteins identified in Hem1−/− erythrocyte insoluble fraction on LTQ-FT. (XLS) [file pone.0054902.s002.xls]

## Sheet:   
Table S2. Proteins identified in Hem1-/- erythrocyte insoluble fraction on LTQ-FT.
Protein Group	Description	Protein ID	Mol.Wt	pI	Coverage	No. Peptides	No. Unique Peptides	No. Spectra	Peptides
1	gi|220941534|emb|CAX15596.1| membrane protein, palmitoylated	IPI00857173.1|TREMBL:B7ZCM0|VEGA:OTTMUSP00000026151	17492	9.11	9.62	2	0	12	ESAGLIPSPELQEWR
1	gi|220941533|emb|CAX15595.1| membrane protein, palmitoylated	IPI00886325.1|TREMBL:B7ZCL9|VEGA:OTTMUSP00000038813	23001.1	8.84	7.32	2	0	12	ESAGLIPSPELQEWR
2	Epb4.1 erythrocyte protein band 4.1 isoform 3	IPI00649753.2|TREMBL:A2A838|ENSEMBL:ENSMUSP00000101600|REFSEQ:NP_001122079|VEGA:OTTMUSP00000010861	92261.1	5.37	15.64	15	1	40	QASALIDRPAPHFER,LAPNQTKELEEK,SALIDRPAPHFER,RGEEPAEPAEPEPTEAWK,SLDGAAAAESTDR,SLDGAAAAESTDRSPRPTSAPAIAQSQVTEGPGAPIKK,LDGENIYIR,SLDGAAAAESTDRSPRPTSAPAIAQSQVTEG,TQTVTISDTANAVK,SVTKVVVHQETEISEE,RGEEPAEPAEPEPTEAWKK,EQHPDMSVTKVVVHQETEISEE
2	gi|122890233|emb|CAM14967.1| erythrocyte protein band 4.1	IPI00649865.1|TREMBL:A2A839|ENSEMBL:ENSMUSP00000095470;ENSMUSP00000101590|VEGA:OTTMUSP00000010276	72424	6.19	20.19	15	1	40	QASALIDRPAPHFER,LAPNQTKELEEK,SALIDRPAPHFER,RGEEPAEPAEPEPTEAWK,SLDGAAAAESTDR,SLDGAAAAESTDRSPRPTSAPAIAQSQVTEGPGAPIKK,LDGENIYIR,SLDGAAAAESTDRSPRPTSAPAIAQSQVTEG,TQTVTISDTANAVK,SVTKVVVHQETEISEE,RGEEPAEPAEPEPTEAWKK,EQHPDMSVTKVVVHQETEISEE
3	gi|123857856|emb|CAM19016.1| erythrocyte protein band 4.2	IPI00653918.2|TREMBL:Q3TYT5;Q3UV95|ENSEMBL:ENSMUSP00000023987|VEGA:OTTMUSP00000017033	74867.3	8.03	11.89	11	11	23	INKTQAIFPISSLGDQKGWSAAVEER,PISSLGDQKGWSAAVEER,RGSVPILRQWLTGQGR,TQAIFPISSLGDQKGWSAAVEER,DVGNCISTK,CEDITQNYKYPAGSLQEK,DVGNCISTKVVGSDR,CEDITQNYKYPAGSLQEKEVLEK,GWSAAVEER
3	Erythrocyte membrane protein band 4.2 OS=Mus musculus GN=Epb42 PE=2 SV=2	IPI00421166.3|SWISS-PROT:P49222	76739.7	6.98	11.58	11	11	23	INKTQAIFPISSLGDQKGWSAAVEER,PISSLGDQKGWSAAVEER,RGSVPILRQWLTGQGR,TQAIFPISSLGDQKGWSAAVEER,DVGNCISTK,CEDITQNYKYPAGSLQEK,DVGNCISTKVVGSDR,CEDITQNYKYPAGSLQEKEVLEK,GWSAAVEER
3	gi|123857855|emb|CAM19015.1| erythrocyte protein band 4.2	IPI00653079.2|TREMBL:Q3T9M7;Q3TYY6;Q3UP33;Q6NXZ8|ENSEMBL:ENSMUSP00000099548|REFSEQ:NP_038541|VEGA:OTTMUSP00000017032	76755.7	6.98	11.58	11	11	23	INKTQAIFPISSLGDQKGWSAAVEER,PISSLGDQKGWSAAVEER,RGSVPILRQWLTGQGR,TQAIFPISSLGDQKGWSAAVEER,DVGNCISTK,CEDITQNYKYPAGSLQEK,DVGNCISTKVVGSDR,CEDITQNYKYPAGSLQEKEVLEK,GWSAAVEER
4	Ammonium transporter Rh type A OS=Mus musculus GN=Rhag PE=2 SV=1	IPI00387362.2|TREMBL:Q3UP27;Q792P7;Q9QUT0|ENSEMBL:ENSMUSP00000024721|REFSEQ:NP_035399|VEGA:OTTMUSP00000032373	47837.4	5.98	4.79	3	3	4	FRELDNRFFQHANHNHVEHEV
5	gi|123298587|emb|CAM27034.1| actin, gamma, cytoplasmic 1	IPI00648420.1|TREMBL:B1ATY0|ENSEMBL:ENSMUSP00000087043;ENSMUSP00000101822|VEGA:OTTMUSP00000004545	32620.4	5.15	12.54	7	0	27	AGFAGDDAPR,SYELPDGQVITIGNER,AVFPSIVGRPR,FPSIVGRPR,AGFAGDDAPRAVFPSIVGRPR,AGFAGDDAPRAVF
6	Glycophorin-C OS=Mus musculus GN=Gypc PE=3 SV=2	IPI00457962.2|TREMBL:Q78HU7|REFSEQ:NP_001041672	10328.9	5.21	32.63	10	10	72	LQSDPALQDAGDTSKKEYFI,GTEFAESADAALQSDPALQDAGDTSKKEYFI,AESADAALQSDPALQDAGDTSKKEYFI,SADAALQSDPALQDAGDTSKKEYFI,QSDPALQDAGDTSKKEYFI,GTEFAESADAALQSDPALQDAGDTSK,PALQDAGDTSKKEYFI
7	gi|28372380|gb|AAO38239.1| Tsap6	IPI00330941.3|SWISS-PROT:Q8CI59-2|ENSEMBL:ENSMUSP00000056248;ENSMUSP00000108262|VEGA:OTTMUSP00000023907	58530.2	9.27	2.09	1	1	1	VGILGSGDFAR
7	Steap3 Isoform 1 of Metalloreductase STEAP3	IPI00126245.3|SWISS-PROT:Q8CI59-1|ENSEMBL:ENSMUSP00000027638;ENSMUSP00000108258;ENSMUSP00000108259;ENSMUSP00000108260|REFSEQ:NP_001078878;NP_573449|VEGA:OTTMUSP00000023903;OTTMUSP00000023904;OTTMUSP00000023905	57352	9.16	2.14	1	1	1	VGILGSGDFAR
7	Steap3 47 kDa protein	IPI00830824.1|VEGA:OTTMUSP00000023906	46965.8	9.26	2.63	1	1	1	VGILGSGDFAR
8	Kell blood group glycoprotein homolog OS=Mus musculus GN=Kel PE=1 SV=1	IPI00111137.3|SWISS-PROT:Q9EQF2|ENSEMBL:ENSMUSP00000031899|REFSEQ:NP_115929|VEGA:OTTMUSP00000032452	80865.5	5.89	1.82	1	1	4	GPPWSQESSPEER
9	gi|148681584|gb|EDL13531.1| mCG124046	IPI00130391.1|TREMBL:B9EJ35;Q3V2G3;Q9Z1R9|ENSEMBL:ENSMUSP00000031910|REFSEQ:NP_444473|VEGA:OTTMUSP00000033342	26134.7	4.75	5.28	1	1	1	VLEGNEQFIDAAK
10	Epb4.1 Erythrocyte protein band 4.1	IPI00649502.2|TREMBL:A2A835;B6ZHC2|ENSEMBL:ENSMUSP00000095471|VEGA:OTTMUSP00000010860	60889.2	5.59	19.86	13	0	38	QASALIDRPAPHFER,SALIDRPAPHFER,RGEEPAEPAEPEPTEAWKDLDK,RGEEPAEPAEPEPTEAWK,SLDGAAAAESTDR,SLDGAAAAESTDRSPRPTSAPAIAQSQVTEGPGAPIKK,SLDGAAAAESTDRSPRPTSAPAIAQSQVTEG,TQTVTISDTANAVK,SVTKVVVHQETEISEE,EQHPDMSVTKVVVHQETEISEE
11	gi|16877277|gb|AAH16897.1| Erythrocyte protein band 4.9	IPI00620207.2|TREMBL:Q8JZV5;Q9WVM2|ENSEMBL:ENSMUSP00000022694;ENSMUSP00000106612|REFSEQ:NP_038542	43041.6	8.3	37.08	15	15	29	STSPPPSPEVWAESRTLGIISQASTPR,SLPDRTPFHTSLHSGTSK,LQKQPLTSPGSVSSSRDSSVPGSPSSIVAK,TKLPPGVDR,TLGIISQASTPR,STSPPPSPEVWAESR,TLGIISQASTPRTTGTPR,LQKQPLTSPGSVSSSR,ESVGGSPQSKHLIEDLIIESSKFPAAQPPDPNQPAK,SLPDRTPFHTSLHSGTSKSSSLPSYGR,ECSLSPKSTSPPPSPEVWAESR
11	Dematin OS=Mus musculus GN=Epb49 PE=1 SV=1	IPI00125328.3|SWISS-PROT:Q9WV69|TREMBL:Q3TYC5;Q3UEW2|ENSEMBL:ENSMUSP00000022695	45468.3	8.52	35.06	15	15	29	STSPPPSPEVWAESRTLGIISQASTPR,SLPDRTPFHTSLHSGTSK,LQKQPLTSPGSVSSSRDSSVPGSPSSIVAK,TKLPPGVDR,TLGIISQASTPR,STSPPPSPEVWAESR,TLGIISQASTPRTTGTPR,LQKQPLTSPGSVSSSR,ESVGGSPQSKHLIEDLIIESSKFPAAQPPDPNQPAK,SLPDRTPFHTSLHSGTSKSSSLPSYGR,ECSLSPKSTSPPPSPEVWAESR
12	Ank1 62 kDa protein	IPI00880715.1|VEGA:OTTMUSP00000032493	61861.9	8.97	30.42	39	0	153	VLLQNDPNPDVLSK,DDQTPLHCAAR,EGHVDTALALLEKEASQACMTK,NGHVRISEILLDHGAPIQAKTK,NDDTRTAAVLLQNDPNPDVLSK,LQNDPNPDVLSK,LLLENGASPNLATTAGHTPLHTAAR,TTAGHTPLHTAAR,SPNLATTAGHTPLHTAAR,LLENGASPNLATTAGHTPLHTAAR,DELTPLHCAAR,AKDDQTPLHCAAR,NGHVRISEILLDHGAPIQAK,EGHVDTALALLEK,AGHTEVAKYLLQNKAK,IGHTGMVKLLLENGASPNLATTAGHTPLHTAAR,TAAVLLQNDPNPDVLSK,PNLATTAGHTPLHTAAR,HVRISEILLDHGAPIQAK,AGHTEVAKYLLQNK,VKLLLENGASPNLATTAGHTPLHT…
13	gi|26370911|dbj|BAC25011.1| unnamed protein product	IPI00229224.1|TREMBL:Q8CF71	12557.5	6.05	10.09	2	0	6	DSYVGDEAQSK
14	Monocarboxylate transporter 1 OS=Mus musculus GN=Slc16a1 PE=1 SV=1	IPI00137194.1|SWISS-PROT:P53986|TREMBL:Q3TIU1;Q3TRK9;Q3UWP4;Q544N9;Q8BPS5;Q8C2E6;Q8C571|ENSEMBL:ENSMUSP00000045216|REFSEQ:NP_033222|VEGA:OTTMUSP00000025586	53267.2	7.43	2.64	1	1	6	SDANTDLIGGSPK
15	gi|46578153|gb|AAT01506.1| plasma membrane Ca++ transporting ATPase 4 splice variant b; PMCA4b	IPI00751474.1|TREMBL:Q6Q477|ENSEMBL:ENSMUSP00000047978|REFSEQ:NP_998781|VEGA:OTTMUSP00000017683	133069	5.81	6.8	8	2	14	TQDGVALEIQPLNSQEGLDSEDKEKK,TQDGVALEIQPLNSQEGLDSEDKEK,TQDGVALEIQPLNSQEGLDSEDK,SSPTDKHTLVKGIIDSTAGEQR,AGTSVLLLDGEAASHDNINNN,LDIQEGNPELVSK
16	Add1 15 kDa protein	IPI00857831.1|VEGA:OTTMUSP00000026790	14805.4	9.38	13.33	3	0	6	SKKYSDVEVPASVTGHSF
17	Aquaporin-1 OS=Mus musculus GN=Aqp1 PE=1 SV=3	IPI00123183.3|SWISS-PROT:Q02013|TREMBL:Q3TLW5|ENSEMBL:ENSMUSP00000004774|REFSEQ:NP_031498|VEGA:OTTMUSP00000031991	28793.5	6.95	11.52	5	5	9	YDLDADDINSR,SFGSAVLTR,VWTSGQVEEYDLDADDINSR,MKVWTSGQVEEYDLDADDINSR
18	Actg2 22 kDa protein	IPI00885500.1|VEGA:OTTMUSP00000038270	21568.7	5.3	21.03	9	0	30	AGFAGDDAPR,AVFPSIVGRPR,FPSIVGRPR,AGFAGDDAPRAVFPSIVGRPR,LTEAPLNPK,AGFAGDDAPRAVF,DSYVGDEAQSK
19	gi|156255173|ref|NP_001095914.1| adducin 1 (alpha) isoform 3	IPI00856144.1|ENSEMBL:ENSMUSP00000001108|REFSEQ:NP_001095914|VEGA:OTTMUSP00000026752	73234.9	6.15	5.13	7	0	16	SKKYSDVEVPASVTGHSF,YFDRVDENNPEYLR,YFDRVDENNPEYLRER
19	Add1 73 kDa protein	IPI00856904.1|ENSEMBL:ENSMUSP00000052266|VEGA:OTTMUSP00000026754	73163.8	6.15	5.14	7	0	16	SKKYSDVEVPASVTGHSF,YFDRVDENNPEYLR,YFDRVDENNPEYLRER
19	Add1 73 kDa protein	IPI00856779.1|ENSEMBL:ENSMUSP00000109974|VEGA:OTTMUSP00000026753	72926.3	5.93	5.15	7	0	16	SKKYSDVEVPASVTGHSF,YFDRVDENNPEYLR,YFDRVDENNPEYLRER
19	gi|148705511|gb|EDL37458.1| adducin 1 (alpha), isoform CRA_a	IPI00225322.1|SWISS-PROT:Q9QYC0-2|ENSEMBL:ENSMUSP00000109977|REFSEQ:NP_038485|VEGA:OTTMUSP00000026751	69886.9	6.08	5.38	7	0	16	SKKYSDVEVPASVTGHSF,YFDRVDENNPEYLR,YFDRVDENNPEYLRER
19	Alpha-adducin OS=Mus musculus GN=Add1 PE=1 SV=2	IPI00136000.1|SWISS-PROT:Q9QYC0-1|TREMBL:Q8K232|ENSEMBL:ENSMUSP00000109979|REFSEQ:NP_001019629|VEGA:OTTMUSP00000026789	80646.5	5.62	4.63	7	0	16	SKKYSDVEVPASVTGHSF,YFDRVDENNPEYLR,YFDRVDENNPEYLRER
20	gi|53598|emb|CAA39940.1| mouse 57-KD Calcium-binding protein (MCaBP)	IPI00458924.1|TREMBL:Q62041	19960.3	4.44	8.43	1	0	6	EEDEEESPGQAKDEL
21	gi|148671697|gb|EDL03644.1| RIKEN cDNA 5830404H04, isoform CRA_a	IPI00330753.4|TREMBL:Q3TE01;Q3UP20;Q5DTR6;Q80XM8;Q8CHZ7|ENSEMBL:ENSMUSP00000058669|REFSEQ:NP_777272	76536.1	7.96	1.58	1	1	2	ENDLDSWELEK
22	5730469M10Rik 11 kDa protein	IPI00880354.1|VEGA:OTTMUSP00000035152	11265.4	8.6	9.71	1	1	1	TFKAKELWEK
22	Uncharacterized protein C10orf58 homolog OS=Mus musculus PE=1 SV=2	IPI00187272.3|SWISS-PROT:Q9CYH2|ENSEMBL:ENSMUSP00000022317|REFSEQ:NP_081740|VEGA:OTTMUSP00000035149	24394.6	9.22	4.59	1	1	1	TFKAKELWEK
22	5730469M10Rik 20 kDa protein	IPI00882290.1|VEGA:OTTMUSP00000035154	19838.3	8.8	5.68	1	1	1	TFKAKELWEK
22	5730469M10Rik 10 kDa protein	IPI00882022.1|VEGA:OTTMUSP00000035156	9739.57	8.66	11.24	1	1	1	TFKAKELWEK
22	5730469M10Rik 23 kDa protein	IPI00880502.1|VEGA:OTTMUSP00000035151	22828.7	8.44	4.93	1	1	1	TFKAKELWEK
22	gi|74221036|dbj|BAE33675.1| unnamed protein product	IPI00880610.1|TREMBL:Q3U125|ENSEMBL:ENSMUSP00000112377|VEGA:OTTMUSP00000035150;OTTMUSP00000035157	25682	9.1	4.37	1	1	1	TFKAKELWEK
22	5730469M10Rik 20 kDa protein	IPI00882173.1|VEGA:OTTMUSP00000035155	19725.2	8.8	5.71	1	1	1	TFKAKELWEK
23	gi|123233598|emb|CAM23318.1| solute carrier family 43, member 1	IPI00750019.1|TREMBL:A2ATS4|ENSEMBL:ENSMUSP00000107252|REFSEQ:NP_001077278|VEGA:OTTMUSP00000014700	65369.5	8.41	6.1	4	4	14	EYATNLVDPQKVLNTSKVAT,VDPQKVLNTSKVAT,PQKVLNTSKVAT,ISSPDIPGTSEETPEK
23	Large neutral amino acids transporter small subunit 3 OS=Mus musculus GN=Slc43a1 PE=1 SV=1	IPI00662681.1|SWISS-PROT:Q8BSM7|TREMBL:A2ATS3|ENSEMBL:ENSMUSP00000107251;ENSMUSP00000112642|REFSEQ:NP_078773|VEGA:OTTMUSP00000014692;OTTMUSP00000014693	62644.3	8.44	6.38	4	4	14	EYATNLVDPQKVLNTSKVAT,VDPQKVLNTSKVAT,PQKVLNTSKVAT,ISSPDIPGTSEETPEK
23	Slc43a1 solute carrier family 43, member 1 isoform 1	IPI00753136.1|TREMBL:B0R0N4|ENSEMBL:ENSMUSP00000028469|REFSEQ:NP_001074818|VEGA:OTTMUSP00000039938	76137.8	9.22	5.21	4	4	14	EYATNLVDPQKVLNTSKVAT,VDPQKVLNTSKVAT,PQKVLNTSKVAT,ISSPDIPGTSEETPEK
24	gi|122890236|emb|CAM14970.1| erythrocyte protein band 4.1	IPI00648008.1|TREMBL:A2A842|ENSEMBL:ENSMUSP00000101594;ENSMUSP00000101599|VEGA:OTTMUSP00000010390	85652.6	5.28	15.99	14	0	39	QASALIDRPAPHFER,LAPNQTKELEEK,SALIDRPAPHFER,RGEEPAEPAEPEPTEAWKDLDK,RGEEPAEPAEPEPTEAWK,SLDGAAAAESTDR,SLDGAAAAESTDRSPRPTSAPAIAQSQVTEGPGAPIKK,SLDGAAAAESTDRSPRPTSAPAIAQSQVTEG,TQTVTISDTANAVK,SVTKVVVHQETEISEE,EQHPDMSVTKVVVHQETEISEE
24	gi|122890234|emb|CAM14968.1| erythrocyte protein band 4.1	IPI00462873.3|SWISS-PROT:P48193-2|TREMBL:A2A840|ENSEMBL:ENSMUSP00000060375;ENSMUSP00000081274|REFSEQ:NP_001122078|VEGA:OTTMUSP00000010392	89664.1	5.31	15.3	14	0	39	QASALIDRPAPHFER,LAPNQTKELEEK,SALIDRPAPHFER,RGEEPAEPAEPEPTEAWKDLDK,RGEEPAEPAEPEPTEAWK,SLDGAAAAESTDR,SLDGAAAAESTDRSPRPTSAPAIAQSQVTEGPGAPIKK,SLDGAAAAESTDRSPRPTSAPAIAQSQVTEG,TQTVTISDTANAVK,SVTKVVVHQETEISEE,EQHPDMSVTKVVVHQETEISEE
25	gi|21595521|gb|AAH32264.1| Hbb-b2 protein	IPI00621417.1|TREMBL:Q5D0E8	15834.2	8.56	22.45	4	0	6	VHLTDAEK,AFQKVVAGVATALAHKYH,FTPAAQAAFQKVVAGVATALAHKYH
25	Hemoglobin subunit beta-2 OS=Mus musculus GN=Hbb-b2 PE=1 SV=2	IPI00316491.4|SWISS-PROT:P02089|TREMBL:Q549D9;Q54AH9|REFSEQ:NP_058652	15878.2	7.85	22.45	4	0	6	VHLTDAEK,AFQKVVAGVATALAHKYH,FTPAAQAAFQKVVAGVATALAHKYH
25	gi|4760588|dbj|BAA77354.1| beta-2-globin	IPI00885376.1|TREMBL:Q9QUN8	15703	8.57	22.6	4	0	6	VHLTDAEK,AFQKVVAGVATALAHKYH,FTPAAQAAFQKVVAGVATALAHKYH
25	gi|156257819|gb|ABU63263.1| beta-globin	IPI00918757.1|TREMBL:A8DV41	15866.2	7.85	22.45	4	0	6	VHLTDAEK,AFQKVVAGVATALAHKYH,FTPAAQAAFQKVVAGVATALAHKYH
26	gi|148672995|gb|EDL04942.1| solute carrier family 16 (monocarboxylic acid transporters), member 10, isoform CRA_a	IPI00881308.1|SWISS-PROT:Q3U9N9-2|REFSEQ:NP_082523	34717.7	6.81	3.75	1	0	2	ESGGSRSSFFSR
27	gi|80475771|gb|AAI09174.1| ATPase, Ca++ transporting, plasma membrane 4	IPI00750917.2|TREMBL:Q32ME1;Q3UPA8|ENSEMBL:ENSMUSP00000107883|VEGA:OTTMUSP00000017679	122295	5.97	4.34	6	0	11	TQDGVALEIQPLNSQEGLDSEDKEKK,TQDGVALEIQPLNSQEGLDSEDKEK,TQDGVALEIQPLNSQEGLDSEDK,SSPTDKHTLVKGIIDSTAGEQR
27	Atp2b4 Plasma membrane Ca++ transporting ATPase 4 splice variant a	IPI00463589.2|TREMBL:Q6Q476|ENSEMBL:ENSMUSP00000083673|VEGA:OTTMUSP00000021380	129257	6.34	4.1	6	0	11	TQDGVALEIQPLNSQEGLDSEDKEKK,TQDGVALEIQPLNSQEGLDSEDKEK,TQDGVALEIQPLNSQEGLDSEDK,SSPTDKHTLVKGIIDSTAGEQR
28	gi|74214757|dbj|BAE31215.1| unnamed protein product	IPI00473320.2|TREMBL:Q3U804;Q3U939;Q3UBQ4;Q3UCF8|ENSEMBL:ENSMUSP00000098066	41799.9	5.9	16.31	12	0	30	SYELPDGQVITIGNER,AVFPSIVGRPR,FPSIVGRPR,VAPEEHPVLLTEAPLNPKANREK,VAPEEHPVLLTEAPLNPK,LTEAPLNPK,VAPEEHPVLLTEAPLNPKANR,DSYVGDEAQSK
29	gi|156119009|emb|CAO91797.1| hemoglobin X, alpha-like embryonic chain in Hba complex	IPI00867788.1|TREMBL:A7M7S6|VEGA:OTTMUSP00000034620	17989.6	9.36	5.77	1	0	1	LRVDPVNFK
29	Hemoglobin subunit zeta OS=Mus musculus GN=Hbz PE=2 SV=2	IPI00230261.5|SWISS-PROT:P06467|TREMBL:Q78PA4;Q9R1L3|ENSEMBL:ENSMUSP00000020531|REFSEQ:NP_034535|VEGA:OTTMUSP00000005548	16234.9	7.06	6.34	1	0	1	LRVDPVNFK
30	Glutamate dehydrogenase 1, mitochondrial OS=Mus musculus GN=Glud1 PE=1 SV=1	IPI00114209.1|SWISS-PROT:P26443|TREMBL:Q3TSQ7|ENSEMBL:ENSMUSP00000022322|REFSEQ:NP_032159|VEGA:OTTMUSP00000039999	61336.8	8.05	1.43	1	1	1	YNLGLDLR
31	Calreticulin OS=Mus musculus GN=Calr PE=1 SV=1	IPI00123639.1|SWISS-PROT:P14211|TREMBL:B2MWM9;Q3TVD2;Q3UWP8|ENSEMBL:ENSMUSP00000003912|REFSEQ:NP_031617|VEGA:OTTMUSP00000025211	47994.5	4.33	9.86	2	1	7	EEDEEESPGQAKDEL,AKIDDPTDSKPEDWDKPEHIPDPDAK
32	gi|74177939|dbj|BAE29765.1| unnamed protein product	IPI00228343.4|SWISS-PROT:P22315|TREMBL:Q3UC49;Q544X6;Q8C3V7;Q91W09|ENSEMBL:ENSMUSP00000025484|REFSEQ:NP_032024	47453.7	9.1	2.37	1	1	2	TKSFFTSQQL
32	gi|67678364|gb|AAH96770.1| Fech protein	IPI00608064.1|TREMBL:Q4QRK2|ENSEMBL:ENSMUSP00000088581	44755.6	9.23	2.51	1	1	2	TKSFFTSQQL
33	gi|12846939|dbj|BAB27370.1| unnamed protein product	IPI00110658.1|TREMBL:Q9CY10|ENSEMBL:ENSMUSP00000090894;ENSMUSP00000090896	15202.4	8.95	59.15	38	0	214	FTPAVHASLDKFLASVSTVLTSKYR,LLVTLASHHPADFTPAVHASLDKFLASVSTVLTSKYR,IGGHGAEYGAEALER,VHASLDKFLASVSTVLTSKYR,SVSTVLTSKYR,HPADFTPAVHASLDKFLASVSTVLTSKYR,ASLDKFLASVSTVLTSKYR,TPAVHASLDKFLASVSTVLTSKYR,LRVDPVNFK,HHPADFTPAVHASLDKFLASVSTVLTSKYR,PAVHASLDKFLASVSTVLTSKYR,TVLTSKYR,LVTLASHHPADFTPAVHASLDKFLASVSTVLTSKYR,LDKFLASVSTVLTSKYR,LASVSTVLTSKYR,DKFLASVSTVLTSKYR,KFLASVSTVLTSKYR,SLDKFLASVSTVLTSKYR,ASHHPADFTPAVHAS…
34	Glycophorin-A OS=Mus musculus GN=Gypa PE=1 SV=2	IPI00123673.1|SWISS-PROT:P14220|TREMBL:Q3TRN7;Q3TZH8;Q3UKI2|ENSEMBL:ENSMUSP00000070836|REFSEQ:NP_034499	17663.8	4.97	20.24	13	13	76	SSVDIQSPEGGDNSVPLSSIEQTPNEESSNV,GDNSVPLSSIEQTPNEESSNV,DNSVPLSSIEQTPNEESSNV,TKKSSVDIQSPEGGDNSVPLSSIEQTPNEESSNV,IQSPEGGDNSVPLSSIEQTPNEESSNV,SVPLSSIEQTPNEESSNV,NSVPLSSIEQTPNEESSNV,SPEGGDNSVPLSSIEQTPNEESSNV,LSSIEQTPNEESSNV,SIEQTPNEESSNV
35	gi|148670870|gb|EDL02817.1| mCG58620	IPI00133640.1|TREMBL:Q3SYK4;Q3UXA0|ENSEMBL:ENSMUSP00000093207|REFSEQ:NP_001028948	83134.8	9.5	2.7	1	1	16	PEMTNLSFATLEAIFDADVK
36	Monocarboxylate transporter 10 OS=Mus musculus GN=Slc16a10 PE=1 SV=1	IPI00654163.1|SWISS-PROT:Q3U9N9-1|TREMBL:Q7TPW2|ENSEMBL:ENSMUSP00000090227|REFSEQ:NP_001107804	55320.2	8.35	7.03	3	2	5	MLENQSSLLSGSSGIFKKDSASII,MLENQSSLLSGSSGIFKK,ESGGSRSSFFSR
37	gi|118505325|gb|ABL01512.1| beta-actin	IPI00885570.1|TREMBL:A1E281	13539.4	5.93	45.45	15	0	45	AGFAGDDAPR,AVFPSIVGRPR,FPSIVGRPR,VAPEEHPVLLTEAPLNPKANREK,AGFAGDDAPRAVFPSIVGRPR,VAPEEHPVLLTEAPLNPK,LTEAPLNPK,VAPEEHPVLLTEAPLNPKANR,AGFAGDDAPRAVF,DSYVGDEAQSK
38	Protein-glutamine gamma-glutamyltransferase 2 OS=Mus musculus GN=Tgm2 PE=1 SV=4	IPI00126861.3|SWISS-PROT:P21981|ENSEMBL:ENSMUSP00000099411|REFSEQ:NP_033399|VEGA:OTTMUSP00000016945	77061	4.98	2.19	1	1	1	SVEVSDPVPAGDLVK
39	Ank1 Erythroid ankyrin	IPI00881305.1|TREMBL:Q61304|VEGA:OTTMUSP00000032489	120859	7.03	24.5	46	0	141	DDQTPLHCAAR,EGHVDTALALLEKEASQACMTK,LLLENGASPNLATTAGHTPLHTAAR,TTAGHTPLHTAAR,SPNLATTAGHTPLHTAAR,LLENGASPNLATTAGHTPLHTAAR,AKDDQTPLHCAAR,EGHVDTALALLEK,AGHTEVAKYLLQNKAK,IGHTGMVKLLLENGASPNLATTAGHTPLHTAAR,PNLATTAGHTPLHTAAR,AGHTEVAKYLLQNK,VKLLLENGASPNLATTAGHTPLHTAAR,DVGEEKELLDFVPKLDQVVESPAIPR,VKLALQAQPVPDELVTKLLGNQATFSPIVTVEPR,LLGNQATFSPIVTVEPR,IPCVTPETVVIR,IPCVTPETVVIRSEDQEQASK,GGSPHSPAWNGYTPLHIAAKQNQIE…
40	Actc1 Actin alpha cardiac	IPI00754167.2|TREMBL:A2AQA5|ENSEMBL:ENSMUSP00000112149|VEGA:OTTMUSP00000016162	7755.49	5.32	29.58	6	0	23	AGFAGDDAPR,AVFPSIVGRPR,FPSIVGRPR,AGFAGDDAPRAVFPSIVGRPR,AGFAGDDAPRAVF
40	gi|123298588|emb|CAM27035.1| actin, gamma, cytoplasmic 1	IPI00648161.1|TREMBL:B1ATY1|ENSEMBL:ENSMUSP00000101821|VEGA:OTTMUSP00000004546	16734.3	6.28	13.73	6	0	23	AGFAGDDAPR,AVFPSIVGRPR,FPSIVGRPR,AGFAGDDAPRAVFPSIVGRPR,AGFAGDDAPRAVF
41	gi|193767|gb|AAA37785.1| beta-globin	IPI00855108.2|TREMBL:Q61348;Q61650	5690.4	4.65	19.23	3	0	4	VHLTDAEK,VHLTDAEKAA
42	gi|148666385|gb|EDK98801.1| mCG1036425	IPI00135857.3|REFSEQ:XP_926169;XP_994787	15984.7	6.34	11.04	1	1	2	TGNAGSRLACGVIGIAQ
42	Superoxide dismutase [Cu-Zn] OS=Mus musculus GN=Sod1 PE=1 SV=2	IPI00130589.8|SWISS-PROT:P08228|ENSEMBL:ENSMUSP00000023707|REFSEQ:NP_035564	15942.7	6.02	11.04	1	1	2	TGNAGSRLACGVIGIAQ
43	Equilibrative nucleoside transporter 1 OS=Mus musculus GN=Slc29a1 PE=1 SV=3	IPI00120769.3|SWISS-PROT:Q9JIM1-1|TREMBL:A8VP81;Q3UJY1|ENSEMBL:ENSMUSP00000063096	50192.3	8.68	2.61	1	1	1	ALADPTVALPAR
43	gi|12584968|ref|NP_075018.1| equilibrative nucleoside transporter 1	IPI00416751.4|SWISS-PROT:Q9JIM1-2|TREMBL:Q3TCZ2|ENSEMBL:ENSMUSP00000063757;ENSMUSP00000094923|REFSEQ:NP_075018	50076.2	8.69	2.62	1	1	1	ALADPTVALPAR
44	gi|123248697|emb|CAM26944.1| Rh blood group, D antigen	IPI00187493.2|TREMBL:O88296;O88297;Q3TZH9;Q8BJB1;Q8CF94;Q9JJ47;Q9JM75;Q9QUM6;Q9QWK3;Q9QX03;Q9QX04|ENSEMBL:ENSMUSP00000030627|REFSEQ:NP_035400|VEGA:OTTMUSP00000011894	45896.1	9.4	4.78	2	2	8	WEFPHLAVGF,AAKYFDDQTFWEFPHLAVGF
45	gi|120538465|gb|AAI29807.1| Spectrin beta 1	IPI00131376.5|SWISS-PROT:P15508|TREMBL:B2RX08;Q149M1;Q3UGX2;Q3UGY4;Q5DTG9;Q8BWJ8|ENSEMBL:ENSMUSP00000021458|REFSEQ:NP_038703	268091	5.32	4.12	12	11	27	IKALADER,ETWLNENQR,INARWDAPDDELDNDNSSARLFER,FAALEKPTTLELK,STASWAERFAALEKPTTLELKER,WDAPDDELDNDNSSAR,WDAPDDELDNDNSSARLFER,AQIDGVNLAANNLVESGHPR,ASGEKVIEGQTD,ARWDAPDDELDNDNSSARLFER
46	gi|123211172|emb|CAM16973.1| spectrin beta 2	IPI00831369.1|TREMBL:P70435;Q5DTR4|VEGA:OTTMUSP00000021662	244251	5.3	0.38	1	0	2	IKALADER
46	Spnb4 14 kDa protein	IPI00857977.1|VEGA:OTTMUSP00000028079	14016.8	5.3	6.25	1	0	2	IKALADER
46	gi|16117405|gb|AAK38731.1| beta4-spectrin	IPI00270149.3|TREMBL:Q91ZE6;Q9EQM0|ENSEMBL:ENSMUSP00000103999;ENSMUSP00000104000;ENSMUSP00000104001|VEGA:OTTMUSP00000028080;OTTMUSP00000028081;OTTMUSP00000028082	288135	5.71	0.31	1	0	2	IKALADER
46	Spectrin beta chain, brain 1 OS=Mus musculus GN=Sptbn1 PE=1 SV=2	IPI00319830.7|SWISS-PROT:Q62261-1|TREMBL:Q8BQ35;Q8R1C2|ENSEMBL:ENSMUSP00000006629;ENSMUSP00000011877|REFSEQ:NP_787030|VEGA:OTTMUSP00000005519	274223	5.4	0.34	1	0	2	IKALADER
46	gi|74188639|dbj|BAE28063.1| unnamed protein product	IPI00134344.6|TREMBL:O35411;Q3UGZ4;Q68FG2;Q68FM2;Q6A087;Q80ZK2|ENSEMBL:ENSMUSP00000008991|REFSEQ:NP_067262	270935	5.62	0.34	1	0	2	IKALADER
46	gi|116174793|ref|NP_115999.2| spectrin beta 4	IPI00856469.1|TREMBL:Q8VBX2;Q8VIE5|ENSEMBL:ENSMUSP00000011895|REFSEQ:NP_115999|VEGA:OTTMUSP00000028078	288824	5.71	0.31	1	0	2	IKALADER
47	gi|111598486|gb|AAH79910.1| Ank1 protein	IPI00874807.1|TREMBL:Q0VGY9|ENSEMBL:ENSMUSP00000106313;ENSMUSP00000113656|VEGA:OTTMUSP00000032488	206867	6.02	25.6	78	3	268	VLLQNDPNPDVLSK,DDQTPLHCAAR,EGHVDTALALLEKEASQACMTK,NGHVRISEILLDHGAPIQAKTK,NDDTRTAAVLLQNDPNPDVLSK,LQNDPNPDVLSK,LLLENGASPNLATTAGHTPLHTAAR,TTAGHTPLHTAAR,SPNLATTAGHTPLHTAAR,LLENGASPNLATTAGHTPLHTAAR,DELTPLHCAAR,AKDDQTPLHCAAR,NGHVRISEILLDHGAPIQAK,EGHVDTALALLEK,AGHTEVAKYLLQNKAK,IGHTGMVKLLLENGASPNLATTAGHTPLHTAAR,TAAVLLQNDPNPDVLSK,PNLATTAGHTPLHTAAR,HVRISEILLDHGAPIQAK,AGHTEVAKYLLQNK,VKLLLENGASPNLATTAGHTPLHT…
47	Ank1 Isoform Br4 of Ankyrin-1	IPI00755019.1|SWISS-PROT:Q02357-4	206897	6.02	25.6	78	3	268	VLLQNDPNPDVLSK,DDQTPLHCAAR,EGHVDTALALLEKEASQACMTK,NGHVRISEILLDHGAPIQAKTK,NDDTRTAAVLLQNDPNPDVLSK,LQNDPNPDVLSK,LLLENGASPNLATTAGHTPLHTAAR,TTAGHTPLHTAAR,SPNLATTAGHTPLHTAAR,LLENGASPNLATTAGHTPLHTAAR,DELTPLHCAAR,AKDDQTPLHCAAR,NGHVRISEILLDHGAPIQAK,EGHVDTALALLEK,AGHTEVAKYLLQNKAK,IGHTGMVKLLLENGASPNLATTAGHTPLHTAAR,TAAVLLQNDPNPDVLSK,PNLATTAGHTPLHTAAR,HVRISEILLDHGAPIQAK,AGHTEVAKYLLQNK,VKLLLENGASPNLATTAGHTPLHT…
47	Ankyrin-1 OS=Mus musculus GN=Ank1 PE=1 SV=2	IPI00127163.4|SWISS-PROT:Q02357-1|ENSEMBL:ENSMUSP00000113531|VEGA:OTTMUSP00000032487	204227	6.09	25.94	78	3	268	VLLQNDPNPDVLSK,DDQTPLHCAAR,EGHVDTALALLEKEASQACMTK,NGHVRISEILLDHGAPIQAKTK,NDDTRTAAVLLQNDPNPDVLSK,LQNDPNPDVLSK,LLLENGASPNLATTAGHTPLHTAAR,TTAGHTPLHTAAR,SPNLATTAGHTPLHTAAR,LLENGASPNLATTAGHTPLHTAAR,DELTPLHCAAR,AKDDQTPLHCAAR,NGHVRISEILLDHGAPIQAK,EGHVDTALALLEK,AGHTEVAKYLLQNKAK,IGHTGMVKLLLENGASPNLATTAGHTPLHTAAR,TAAVLLQNDPNPDVLSK,PNLATTAGHTPLHTAAR,HVRISEILLDHGAPIQAK,AGHTEVAKYLLQNK,VKLLLENGASPNLATTAGHTPLHT…
47	Ank1 Isoform Er3 of Ankyrin-1	IPI00474771.2|SWISS-PROT:Q02357-3|ENSEMBL:ENSMUSP00000081050|VEGA:OTTMUSP00000032490	204290	5.93	25.93	78	3	268	VLLQNDPNPDVLSK,DDQTPLHCAAR,EGHVDTALALLEKEASQACMTK,NGHVRISEILLDHGAPIQAKTK,NDDTRTAAVLLQNDPNPDVLSK,LQNDPNPDVLSK,LLLENGASPNLATTAGHTPLHTAAR,TTAGHTPLHTAAR,SPNLATTAGHTPLHTAAR,LLENGASPNLATTAGHTPLHTAAR,DELTPLHCAAR,AKDDQTPLHCAAR,NGHVRISEILLDHGAPIQAK,EGHVDTALALLEK,AGHTEVAKYLLQNKAK,IGHTGMVKLLLENGASPNLATTAGHTPLHTAAR,TAAVLLQNDPNPDVLSK,PNLATTAGHTPLHTAAR,HVRISEILLDHGAPIQAK,AGHTEVAKYLLQNK,VKLLLENGASPNLATTAGHTPLHT…
48	gi|1127025|dbj|BAA11508.1| basigin precursor	IPI00113869.1|SWISS-PROT:P18572-2|TREMBL:O55108|ENSEMBL:ENSMUSP00000101020|REFSEQ:NP_001070652	29674.5	5.36	24.54	10	2	32	SGEYSCIFLPEPVGRSEINVEGPPRIK,SEINVEGPPRIK,GGKVLQEDTLPDLHTKYIVDADDR,SGEYSCIFLPEPVGR,AAAGTIQTSVQEVNSK,AAGTIQTSVQEVNSK
49	gi|11230778|ref|NP_068683.1| tropomodulin 1	IPI00655150.1|TREMBL:Q3KP84|ENSEMBL:ENSMUSP00000030012;ENSMUSP00000103402|REFSEQ:NP_068683|VEGA:OTTMUSP00000007260	40466	5.02	8.64	1	1	1	EGLNSVIKPTQYKPVPDEEPNSTDVEETLER
49	Tropomodulin-1 OS=Mus musculus GN=Tmod1 PE=2 SV=1	IPI00309658.1|SWISS-PROT:P49813	40484.1	5.02	8.64	1	1	1	EGLNSVIKPTQYKPVPDEEPNSTDVEETLER
50	Trypsin OS=Sus scrofa PE=1 SV=1	gi|136429|sp|P00761|TRYP_PIG	24409.5	7	23.38	36	36	204	VLEGNEQFINAAK,LSSPATLNSR,IITHPNFNGNTLDND,IQVRLGEHNIDVLEGNEQFINAAK,LIKLSSPATLNSR,IDVLEGNEQFINAAK,LGEHNIDVLEGNE,LGEHNIDVLEGNEQFINAA,LGEHNIDVLEGN,LGEHNIDVLEGNEQFINAAK,IITHPNFNGNTL,LGEHNIDVLEGNEQF,LGEHNIDVLEGNEQFINA,LGEHNIDVLEGNEQ,IITHPNFNGNTLDNDIMLIKLSSPATLNSR,GNEQFINAAK,LGEHNIDVLEGNEQFINAAKIITHPNFNG,IITHPNFNGNTLDN,IITHPNFNGNTLDNDIMLIK,IKLSSPATLNSR,IITHPNFNGNTLD,NIDVLEGNEQFINAAK,LGEHNIDVLEGNEQFIN,LG…
51	Cytochrome c oxidase subunit 4 isoform 1, mitochondrial OS=Mus musculus GN=Cox4i1 PE=1 SV=2	IPI00117978.1|SWISS-PROT:P19783|TREMBL:A2RSV8|ENSEMBL:ENSMUSP00000034276|REFSEQ:NP_034071	19530.5	9.25	7.69	1	1	1	AHGSVVKSEDYAF
52	Hemoglobin subunit beta-1 OS=Mus musculus GN=Hbb-b1 PE=1 SV=2	IPI00553333.2|SWISS-PROT:P02088|TREMBL:A8DUK0	15840.2	7.13	23.81	5	0	7	VHLTDAEK,AFQKVVAGVATALAHKYH,FTPAAQAAFQKVVAGVATALAHKYH,VHLTDAEKAA
53	Disheveled-associated activator of morphogenesis 1 OS=Mus musculus GN=Daam1 PE=2 SV=3	IPI00857742.1|SWISS-PROT:Q8BPM0-1	123336	7.12	0.84	1	1	1	ERPITKLNF
53	Daam1 Isoform 2 of Disheveled-associated activator of morphogenesis 1	IPI00621301.2|SWISS-PROT:Q8BPM0-2|TREMBL:Q8BTF1|ENSEMBL:ENSMUSP00000036187	122577	7.12	0.84	1	1	1	ERPITKLNF
54	gi|149259311|ref|XP_001481366.1| PREDICTED: similar to hCG1980844	IPI00850925.1|REFSEQ:XP_001481366	266446	8.64	0.75	1	1	3	EDEEHELELDHLEPEPQAR
55	Band 3 anion transport protein OS=Mus musculus GN=Slc4a1 PE=1 SV=1	IPI00120761.3|SWISS-PROT:P04919-1|TREMBL:Q3TA19;Q3TAJ4;Q3TNH7;Q3TNL6;Q3TZ12;Q3TZ29;Q3TZG9;Q3TZJ1;Q3U065;Q53ZN9|ENSEMBL:ENSMUSP00000006749|REFSEQ:NP_035533|VEGA:OTTMUSP00000002635	103136	5.31	16.9	38	1	133	SVTHANALTVMGKASGPGAAAQIQEVK,ALLNLVPVQKELLR,SGGASEPLLPHQPSLET,LEGVKPAVLTR,PNLYNTLDLNGGKGGPGDEDDPLRR,YLPSPAKPDPNLYN,ALLNLVPVQK,NLEGVKPAVLTR,YLPSPAKPDPNLYNTLDLNGGK,GNLEGVKPAVLTR,SGGASEPLLPHQPSLE,ASGPGAAAQIQE,ASGPGAAAQIQEVK,SGGASEPLLPHQPSLETQLYCGQAEGGSEG,SGGASEPLLPHQPSLETQLYCGQAEGGSEGPSTSGTLK,SHAEDLGNLEGVKPAVLTR,YLPSPAKPDPNLYNTLDLNGGKGGPGDEDDPLRR,SGGASEPLLPHQPSLETQLYCGQAEGG,SVTHANALTVMGK,YDEVPMPV,ALL…
56	gi|220808512|emb|CAI24672.2| ubiquitin B	IPI00923013.1|TREMBL:Q5SX22|VEGA:OTTMUSP00000045396	26619.7	7.85	15.25	1	1	2	LIFAGKQLEDGR
56	gi|13879398|gb|AAH06680.1| Ubc protein	IPI00750889.3|SWISS-PROT:P62991|TREMBL:A5JUZ1;Q3TH47;Q8R0Z9;Q922B0;Q922Z8|ENSEMBL:ENSMUSP00000107019|REFSEQ:XP_001479882;XP_001479885	65456.4	8.74	14.43	1	1	2	LIFAGKQLEDGR
56	gi|12805285|gb|AAH02108.1| Ribosomal protein S27A	IPI00470152.2|SWISS-PROT:P62983|TREMBL:Q642L7|ENSEMBL:ENSMUSP00000077824;ENSMUSP00000099908;ENSMUSP00000099909|REFSEQ:NP_001029037;NP_077239;XP_001481004;XP_889611|VEGA:OTTMUSP00000005506;OTTMUSP00000005507	17950.9	9.68	7.69	1	1	2	LIFAGKQLEDGR
56	2810422J05Rik Ubiquitin A-52 residue ribosomal protein fusion product 1	IPI00918763.1|TREMBL:B0LAC2|VEGA:OTTMUSP00000045519	10913.7	7.76	12.5	1	1	2	LIFAGKQLEDGR
56	gi|149254584|ref|XP_001471749.1| PREDICTED: ubiquitin C	IPI00755916.3|TREMBL:Q8VC46|ENSEMBL:ENSMUSP00000088927|REFSEQ:NP_062613;XP_001471749	82550.1	8.65	14.71	1	1	2	LIFAGKQLEDGR
56	gi|149259705|ref|XP_001004010.2| PREDICTED: similar to ubiquitin A-52 residue ribosomal protein fusion product 1	IPI00751589.2|REFSEQ:XP_001004010	23937.8	9.47	5.48	1	1	2	LIFAGKQLEDGR
56	gi|149260017|ref|XP_985698.2| PREDICTED: similar to ubiquitin A-52 residue ribosomal protein fusion product 1	IPI00621468.3|ENSEMBL:ENSMUSP00000109177|REFSEQ:XP_985698	23083.3	9.84	5.91	1	1	2	LIFAGKQLEDGR
56	gi|26353460|dbj|BAC40360.1| unnamed protein product	IPI00923082.1|TREMBL:Q8C2K3	17224.7	5.92	7.84	1	1	2	LIFAGKQLEDGR
56	gi|12833702|dbj|BAB22630.1| unnamed protein product	IPI00923037.1|ENSEMBL:ENSMUSP00000104347	25821.7	6.86	15.72	1	1	2	LIFAGKQLEDGR
56	2810422J05Rik 27 kDa protein	IPI00895479.1|ENSEMBL:ENSMUSP00000113804|VEGA:OTTMUSP00000040787	26856.2	9.86	5.17	1	1	2	LIFAGKQLEDGR
56	2810422J05Rik 22 kDa protein	IPI00895319.1|VEGA:OTTMUSP00000040773	22233.6	9.26	6.22	1	1	2	LIFAGKQLEDGR
56	gi|94378076|ref|XP_001002242.1| PREDICTED: similar to fusion protein: ubiquitin (bases 43_513); ribosomal protein S27a (bases 217_532)	IPI00755353.2|REFSEQ:XP_001002242	17878.8	9.73	7.69	1	1	2	LIFAGKQLEDGR
56	gi|82902501|ref|XP_930453.1| PREDICTED: similar to ubiquitin/40S ribosomal protein S27a fusion protein isoform 2	IPI00660718.1|TREMBL:Q3TWD1|REFSEQ:XP_930453	17750.7	9.7	7.74	1	1	2	LIFAGKQLEDGR
56	gi|123229720|emb|CAM18649.1| novel protein identical to ubiquitin A-52 residue ribosomal protein fusion product 1 Uba52	IPI00138892.2|SWISS-PROT:P62984|TREMBL:Q66JP1|ENSEMBL:ENSMUSP00000080608;ENSMUSP00000086852|REFSEQ:NP_001098627;NP_063936|VEGA:OTTMUSP00000004786;OTTMUSP00000045514;OTTMUSP00000045515;OTTMUSP00000045516;OTTMUSP00000045517;OTTMUSP00000045518	14728.3	9.87	9.38	1	1	2	LIFAGKQLEDGR
56	gi|12840717|dbj|BAB24930.1| unnamed protein product	IPI00139518.3|TREMBL:Q6NZC5;Q78XY9|ENSEMBL:ENSMUSP00000019649|REFSEQ:NP_035794|VEGA:OTTMUSP00000006062	34368.5	6.94	15.74	1	1	2	LIFAGKQLEDGR
56	gi|148698174|gb|EDL30121.1| mCG16273	IPI00342013.3|REFSEQ:XP_916880;XP_978405	13537.8	10.1	10.17	1	1	2	LIFAGKQLEDGR
57	gi|219521051|gb|AAI71944.1| Ank1 protein	IPI00119871.3|SWISS-PROT:Q02357-2|TREMBL:B7ZW98|ENSEMBL:ENSMUSP00000081051|REFSEQ:NP_112435|VEGA:OTTMUSP00000032483	202963	6.14	23.97	74	0	259	VLLQNDPNPDVLSK,DDQTPLHCAAR,EGHVDTALALLEKEASQACMTK,NGHVRISEILLDHGAPIQAKTK,NDDTRTAAVLLQNDPNPDVLSK,LQNDPNPDVLSK,LLLENGASPNLATTAGHTPLHTAAR,TTAGHTPLHTAAR,SPNLATTAGHTPLHTAAR,LLENGASPNLATTAGHTPLHTAAR,DELTPLHCAAR,AKDDQTPLHCAAR,NGHVRISEILLDHGAPIQAK,EGHVDTALALLEK,AGHTEVAKYLLQNKAK,IGHTGMVKLLLENGASPNLATTAGHTPLHTAAR,TAAVLLQNDPNPDVLSK,PNLATTAGHTPLHTAAR,HVRISEILLDHGAPIQAK,AGHTEVAKYLLQNK,VKLLLENGASPNLATTAGHTPLHT…
58	Slc4a1 Isoform Kidney of Band 3 anion transport protein	IPI00230594.1|SWISS-PROT:P04919-2	94233.8	6.25	17.18	37	0	131	SVTHANALTVMGKASGPGAAAQIQEVK,ALLNLVPVQKELLR,SGGASEPLLPHQPSLET,LEGVKPAVLTR,PNLYNTLDLNGGKGGPGDEDDPLRR,YLPSPAKPDPNLYN,ALLNLVPVQK,NLEGVKPAVLTR,YLPSPAKPDPNLYNTLDLNGGK,GNLEGVKPAVLTR,SGGASEPLLPHQPSLE,ASGPGAAAQIQE,ASGPGAAAQIQEVK,SGGASEPLLPHQPSLETQLYCGQAEGGSEG,SGGASEPLLPHQPSLETQLYCGQAEGGSEGPSTSGTLK,SHAEDLGNLEGVKPAVLTR,YLPSPAKPDPNLYNTLDLNGGKGGPGDEDDPLRR,SGGASEPLLPHQPSLETQLYCGQAEGG,SVTHANALTVMGK,YDEVPMPV,ALL…
59	gi|48237757|gb|AAT40730.1| beta-actin	IPI00857335.1|TREMBL:Q6IWE2	8593.64	4.45	20.78	1	0	4	SYELPDGQVITIGNER
59	gi|13516473|dbj|BAB40317.1| beta-actin FE-3	IPI00874780.1|TREMBL:Q99NC5	14983.2	5.65	11.94	1	0	4	SYELPDGQVITIGNER
60	gi|156257839|gb|ABU63273.1| beta-globin	IPI00918032.1|TREMBL:A8DV59	15848.2	7.85	17.01	2	0	3	AFQKVVAGVATALAHKYH,FTPAAQAAFQKVVAGVATALAHKYH
61	gi|110347404|ref|NP_001030079.2| zinc finger CCCH-type containing 12B	IPI00606700.3|TREMBL:Q3UYJ7|ENSEMBL:ENSMUSP00000080820|REFSEQ:NP_001030079	93899.9	6.73	2.87	1	1	1	LGYAEEQIQSVLNKLGPESLINDV
62	Gpx1 Glutathione peroxidase 1	IPI00319652.2|SWISS-PROT:P11352|TREMBL:Q5RJH8|REFSEQ:NP_032186	22282.4	6.73	10.95	1	1	3	RFRTIDIEPDIETLLSQQSGNS
63	Claudin-13 OS=Mus musculus GN=Cldn13 PE=2 SV=1	IPI00129389.1|SWISS-PROT:Q9Z0S4|TREMBL:Q547B2|ENSEMBL:ENSMUSP00000008987|REFSEQ:NP_065250|VEGA:OTTMUSP00000031782	23503.7	5.54	4.74	1	1	3	VVSKQEAISF
64	Ubiquitin thioesterase OTU1 OS=Mus musculus GN=Yod1 PE=2 SV=1	IPI00228177.1|SWISS-PROT:Q8CB27|TREMBL:A4FTZ0;B2RSW9|ENSEMBL:ENSMUSP00000055318|REFSEQ:NP_848806	37485.5	5.51	2.92	1	1	1	ETGHTNFGEV
65	gi|123230144|emb|CAM26487.1| membrane protein, palmitoylated	IPI00831110.1|TREMBL:A2AN84|ENSEMBL:ENSMUSP00000109725|VEGA:OTTMUSP00000022729	50535.8	9.24	6.64	3	0	13	ESAGLIPSPELQEWR,IAILDIEPQTLKTVR
66	Protein disulfide-isomerase A3 OS=Mus musculus GN=Pdia3 PE=1 SV=2	IPI00230108.6|SWISS-PROT:P27773|ENSEMBL:ENSMUSP00000028683|REFSEQ:NP_031978|VEGA:OTTMUSP00000016318	56678.4	5.88	2.77	1	1	2	SDVLELTDENFESR
66	Pdia3 14 kDa protein	IPI00885558.1|VEGA:OTTMUSP00000038623	13588.5	7.87	11.29	1	1	2	SDVLELTDENFESR
67	gi|124297424|gb|AAI32246.1| RIKEN cDNA 1810009J06 gene	IPI00131673.1|TREMBL:Q7TT42;Q9CPN7|ENSEMBL:ENSMUSP00000075935|REFSEQ:NP_076196	26503.3	6.5	8.1	2	2	16	LGEHNIDVLEGGEQFIDAEK
67	gi|149255093|ref|XP_001476625.1| PREDICTED: similar to trypsinogen 4	IPI00849742.1|REFSEQ:NP_001096130;XP_001476625	26576.4	6.5	8.1	2	2	16	LGEHNIDVLEGGEQFIDAEK
68	Protein 4.1 OS=Mus musculus GN=Epb41 PE=1 SV=2	IPI00395157.2|SWISS-PROT:P48193-1|TREMBL:B6ZHC8|ENSEMBL:ENSMUSP00000030739;ENSMUSP00000101592;ENSMUSP00000101601|REFSEQ:NP_906273|VEGA:OTTMUSP00000010859	95911.2	5.44	15.27	15	0	41	QASALIDRPAPHFER,LAPNQTKELEEK,SALIDRPAPHFER,RGEEPAEPAEPEPTEAWK,SLDGAAAAESTDR,SLDGAAAAESTDRSPRPTSAPAIAQSQVTEGPGAPIKK,LDGENIYIR,RGEEPAEPAEPEPTEAWKVEK,SLDGAAAAESTDRSPRPTSAPAIAQSQVTEG,TQTVTISDTANAVK,SVTKVVVHQETEISEE,EQHPDMSVTKVVVHQETEISEE
68	gi|122890235|emb|CAM14969.1| erythrocyte protein band 4.1	IPI00649005.1|TREMBL:A2A841|ENSEMBL:ENSMUSP00000101595;ENSMUSP00000101602|VEGA:OTTMUSP00000010393	97239.7	5.35	15.07	15	0	41	QASALIDRPAPHFER,LAPNQTKELEEK,SALIDRPAPHFER,RGEEPAEPAEPEPTEAWK,SLDGAAAAESTDR,SLDGAAAAESTDRSPRPTSAPAIAQSQVTEGPGAPIKK,LDGENIYIR,RGEEPAEPAEPEPTEAWKVEK,SLDGAAAAESTDRSPRPTSAPAIAQSQVTEG,TQTVTISDTANAVK,SVTKVVVHQETEISEE,EQHPDMSVTKVVVHQETEISEE
69	gi|156257619|gb|ABU63177.1| beta-globin	IPI00762198.2|TREMBL:A8DUK2;A8DUK4;A8DUL0;A8DUL2;A8DUL5;A8DUL7;A8DUM2;A8DUN2;A8DUP0;A8DUP3;A8DUP5;A8DUP7;A8DUQ1;A8DUQ5;B1Q450|ENSEMBL:ENSMUSP00000023934;ENSMUSP00000095794|REFSEQ:NP_032246|VEGA:OTTMUSP00000020530;OTTMUSP00000020541	16233.6	7.94	36.42	28	0	100	VHLTDAEK,AFQKVVAGVATALAHKYH,FTPAAQAAFQKVVAGVATALAHKYH,VHLTDAEKAA,VHLTDAEKAAVSGLWG,VHLTDAEKAAVSGLWGKVNADEVGGEAL,VHLTDAEKAAVSGLWGKVNADEVGGE,VHLTDAEKAAVSGLWGKVNADEVG,VHLTDAEKAAVSG,VHLTDAEKAAVSGLWGKVNADE,VHLTDAEKAAVSGLWGKVNAD,VHLTDAEKAAVSGLW,VHLTDAEKAAVSGLWGKVNADEVGG,VHLTDAEKAAVSGLWGK,VHLTDAEKAAVSGLWGKVNADEVGGEALG,VHLTDAEKAAVSGLWGKVNADEVGGEALGR,VHLTDAEKAAVSGLWGKVNA,VHLTDAEKAAVSGLWGKVN,VHLTDAEKAAVSGL
70	gi|156257625|gb|ABU63180.1| beta-globin	IPI00831055.2|TREMBL:A8DUK7|VEGA:OTTMUSP00000020531	15721	7.13	38.1	31	5	109	VHLTDAEK,VHLTDAEKAA,VHLTDAEKAAVSGLWG,VHLTDAEKAAVSGLWGKVNADEVGGEAL,VHLTDAEKAAVSGLWGKVNADEVGGE,VHLTDAEKAAVSGLWGKVNADEVG,VHLTDAEKAAVSG,VHLTDAEKAAVSGLWGKVNADE,VHLTDAEKAAVSGLWGKVNAD,VHLTDAEKAAVSGLW,VHLTDAEKAAVSGLWGKVNADEVGG,VHLTDAEKAAVSGLWGK,VHLTDAEKAAVSGLWGKVNADEVGGEALG,VHLTDAEKAAVSGLWGKVNADEVGGEALGR,VHLTDAEKAAVSGLWGKVNA,VHLTDAEKAAVSGLWGKVN,VHLTDAEKAAVSGL,TPAAQAAFQKVVAGVAAALAHKYH,DFTPAAQAAFQKVVAGVAAA…
71	gi|123273854|emb|CAM24479.1| butyrophilin related 1	IPI00224036.3|TREMBL:Q8C0U8|ENSEMBL:ENSMUSP00000063279|VEGA:OTTMUSP00000017081	54151.5	5.91	7.32	2	2	3	DEAGLFHVSLSLDPETASPK,SVKRLLFDQDVFPSSR
72	Actin, alpha cardiac muscle 1 OS=Mus musculus GN=Actc1 PE=1 SV=1	IPI00114593.1|SWISS-PROT:P68033|TREMBL:Q497E4;Q61273;Q61274;Q61275|ENSEMBL:ENSMUSP00000087736|REFSEQ:NP_033738|VEGA:OTTMUSP00000016161	42019	5.23	15.12	10	0	34	AGFAGDDAPR,SYELPDGQVITIGNER,AVFPSIVGRPR,FPSIVGRPR,AGFAGDDAPRAVFPSIVGRPR,LTEAPLNPK,AGFAGDDAPRAVF,DSYVGDEAQSK
72	Actin, gamma-enteric smooth muscle OS=Mus musculus GN=Actg2 PE=2 SV=1	IPI00404804.1|SWISS-PROT:P63268|TREMBL:Q3UJ36|ENSEMBL:ENSMUSP00000074658;ENSMUSP00000113552|REFSEQ:NP_033740|VEGA:OTTMUSP00000038268;OTTMUSP00000038269	41876.9	5.31	15.16	10	0	34	AGFAGDDAPR,SYELPDGQVITIGNER,AVFPSIVGRPR,FPSIVGRPR,AGFAGDDAPRAVFPSIVGRPR,LTEAPLNPK,AGFAGDDAPRAVF,DSYVGDEAQSK
72	gi|74223027|dbj|BAE40656.1| unnamed protein product	IPI00653007.1|TREMBL:Q3TG92	42047	5.23	15.12	10	0	34	AGFAGDDAPR,SYELPDGQVITIGNER,AVFPSIVGRPR,FPSIVGRPR,AGFAGDDAPRAVFPSIVGRPR,LTEAPLNPK,AGFAGDDAPRAVF,DSYVGDEAQSK
72	Actg2 30 kDa protein	IPI00885994.1|VEGA:OTTMUSP00000038271	30065.2	4.96	21.11	10	0	34	AGFAGDDAPR,SYELPDGQVITIGNER,AVFPSIVGRPR,FPSIVGRPR,AGFAGDDAPRAVFPSIVGRPR,LTEAPLNPK,AGFAGDDAPRAVF,DSYVGDEAQSK
72	Actin, aortic smooth muscle OS=Mus musculus GN=Acta2 PE=1 SV=1	IPI00117043.1|SWISS-PROT:P62737|TREMBL:Q3U122|ENSEMBL:ENSMUSP00000048218|REFSEQ:NP_031418	42008.9	5.24	15.12	10	0	34	AGFAGDDAPR,SYELPDGQVITIGNER,AVFPSIVGRPR,FPSIVGRPR,AGFAGDDAPRAVFPSIVGRPR,LTEAPLNPK,AGFAGDDAPRAVF,DSYVGDEAQSK
72	gi|12852068|dbj|BAB29260.1| unnamed protein product	IPI00480406.1|TREMBL:Q9CXK3	41946.9	5.3	15.12	10	0	34	AGFAGDDAPR,SYELPDGQVITIGNER,AVFPSIVGRPR,FPSIVGRPR,AGFAGDDAPRAVFPSIVGRPR,LTEAPLNPK,AGFAGDDAPRAVF,DSYVGDEAQSK
72	gi|74147226|dbj|BAE27513.1| unnamed protein product	IPI00654242.1|TREMBL:Q3UIJ3	42118.1	5.31	15.12	10	0	34	AGFAGDDAPR,SYELPDGQVITIGNER,AVFPSIVGRPR,FPSIVGRPR,AGFAGDDAPRAVFPSIVGRPR,LTEAPLNPK,AGFAGDDAPRAVF,DSYVGDEAQSK
72	Actin, alpha skeletal muscle OS=Mus musculus GN=Acta1 PE=1 SV=1	IPI00110827.1|SWISS-PROT:P68134|TREMBL:Q61264;Q61272|ENSEMBL:ENSMUSP00000034453|REFSEQ:NP_033736	42051	5.23	15.12	10	0	34	AGFAGDDAPR,SYELPDGQVITIGNER,AVFPSIVGRPR,FPSIVGRPR,AGFAGDDAPRAVFPSIVGRPR,LTEAPLNPK,AGFAGDDAPRAVF,DSYVGDEAQSK
72	gi|1581799|prf||2117293A actin:ISOTYPE=gamma	IPI00266875.5|TREMBL:Q61852	42879.8	5.36	14.5	10	0	34	AGFAGDDAPR,SYELPDGQVITIGNER,AVFPSIVGRPR,FPSIVGRPR,AGFAGDDAPRAVFPSIVGRPR,LTEAPLNPK,AGFAGDDAPRAVF,DSYVGDEAQSK
73	Cysteine-rich protein 2 OS=Mus musculus GN=Crip2 PE=1 SV=1	IPI00121319.1|SWISS-PROT:Q9DCT8|TREMBL:Q4FJU3|ENSEMBL:ENSMUSP00000081943|REFSEQ:NP_077185	22727	8.94	12.5	1	1	1	IYEKPQTEAPQVTGPIEVPVVRTEER
74	DnaJ homolog subfamily C member 5 OS=Mus musculus GN=Dnajc5 PE=1 SV=1	IPI00132206.13|SWISS-PROT:P60904|TREMBL:A2AUE2;Q921J3|ENSEMBL:ENSMUSP00000072175;ENSMUSP00000104424;ENSMUSP00000104425|REFSEQ:NP_058055|VEGA:OTTMUSP00000018139;OTTMUSP00000018140;OTTMUSP00000018141	22100.7	4.93	17.17	2	2	3	EATDTPIVIQPASATETTQLTADSHPSYHTDGFN
75	Beta-adducin OS=Mus musculus GN=Add2 PE=1 SV=4	IPI00323122.1|SWISS-PROT:Q9QYB8-1|TREMBL:Q8C0Y2|ENSEMBL:ENSMUSP00000032069|REFSEQ:NP_038486	80641.9	5.87	2.9	1	1	2	TRWLNTPNTYLRVNVADEVQR
75	gi|148666740|gb|EDK99156.1| adducin 2 (beta), isoform CRA_b	IPI00400328.3|SWISS-PROT:Q9QYB8-2	62816.2	6.09	3.74	1	1	2	TRWLNTPNTYLRVNVADEVQR
76	Endoplasmin OS=Mus musculus GN=Hsp90b1 PE=1 SV=2	IPI00129526.1|SWISS-PROT:P08113|TREMBL:Q3UAD6;Q3UBU0;Q8C2R2;Q8CCY5;Q91V38;Q9CW12|ENSEMBL:ENSMUSP00000020238|REFSEQ:NP_035761|VEGA:OTTMUSP00000022393	92475.8	4.74	2.24	2	2	6	DDEVDVDGTVEEDLGKSR
77	gi|74187644|dbj|BAE36758.1| unnamed protein product	IPI00652436.3|TREMBL:Q3TSB7	41737.8	5.23	18.93	16	0	49	AGFAGDDAPR,SYELPDGQVITIGNER,AVFPSIVGRPR,FPSIVGRPR,VAPEEHPVLLTEAPLNPKANREK,AGFAGDDAPRAVFPSIVGRPR,VAPEEHPVLLTEAPLNPK,LTEAPLNPK,VAPEEHPVLLTEAPLNPKANR,AGFAGDDAPRAVF,DSYVGDEAQSK
77	Actin, cytoplasmic 2 OS=Mus musculus GN=Actg1 PE=1 SV=1	IPI00874482.1|SWISS-PROT:P63260|TREMBL:Q3UD81;Q4KL81|ENSEMBL:ENSMUSP00000071486|REFSEQ:NP_033739|VEGA:OTTMUSP00000004544	41792.8	5.31	18.93	16	0	49	AGFAGDDAPR,SYELPDGQVITIGNER,AVFPSIVGRPR,FPSIVGRPR,VAPEEHPVLLTEAPLNPKANREK,AGFAGDDAPRAVFPSIVGRPR,VAPEEHPVLLTEAPLNPK,LTEAPLNPK,VAPEEHPVLLTEAPLNPKANR,AGFAGDDAPRAVF,DSYVGDEAQSK
77	Actin, cytoplasmic 1 OS=Mus musculus GN=Actb PE=1 SV=1	IPI00110850.1|SWISS-PROT:P60710|TREMBL:B2RRX1;Q3TIJ9;Q3U5R4;Q3UA89;Q3UAA9;Q3UAF6;Q3UAF7;Q3UBP6;Q3UGS0;Q61276|ENSEMBL:ENSMUSP00000031564|REFSEQ:NP_031419	41736.7	5.29	18.93	16	0	49	AGFAGDDAPR,SYELPDGQVITIGNER,AVFPSIVGRPR,FPSIVGRPR,VAPEEHPVLLTEAPLNPKANREK,AGFAGDDAPRAVFPSIVGRPR,VAPEEHPVLLTEAPLNPK,LTEAPLNPK,VAPEEHPVLLTEAPLNPKANR,AGFAGDDAPRAVF,DSYVGDEAQSK
78	gi|149246433|ref|XP_909724.2| PREDICTED: similar to erythroid spectrin alpha	IPI00679092.2|REFSEQ:XP_909724	283234	5.01	5.68	21	21	103	HESFVSEVQAKSRVLPELEEIR,AEQVDGVINLGNSLIERR,CALVSRGDSGDTLAATQSLLK,VGFTNSFFGN,SRVLPELEEIR,CALVSRGDSGDTL,SQPAGYDYVGFTNSFFGN,FQSADATGQELLDGNHEASEEIR,VIALYDFEAR,AEQVDGVINLGNSLIER,GRSQPAGYDYVGFTNSFFGN,SRVLPELEEIREAR,HESFVSEVQAK,PRGRSQPAGYDYVGFTNSFFGN,LSEIAELKDQLVAGEHSQAK
78	gi|1841857|gb|AAB47540.1| erythroid alpha-spectrin	IPI00323230.5|SWISS-PROT:P08032	279994	4.92	5.76	21	21	103	HESFVSEVQAKSRVLPELEEIR,AEQVDGVINLGNSLIERR,CALVSRGDSGDTLAATQSLLK,VGFTNSFFGN,SRVLPELEEIR,CALVSRGDSGDTL,SQPAGYDYVGFTNSFFGN,FQSADATGQELLDGNHEASEEIR,VIALYDFEAR,AEQVDGVINLGNSLIER,GRSQPAGYDYVGFTNSFFGN,SRVLPELEEIREAR,HESFVSEVQAK,PRGRSQPAGYDYVGFTNSFFGN,LSEIAELKDQLVAGEHSQAK
78	Spectrin alpha chain, erythrocyte OS=Mus musculus GN=Spta1 PE=2 SV=3	IPI00896567.1|TREMBL:B2RWX6;Q3UQ30;Q8C3F9|ENSEMBL:ENSMUSP00000027817|REFSEQ:NP_035595|VEGA:OTTMUSP00000038061	279865	4.94	5.76	21	21	103	HESFVSEVQAKSRVLPELEEIR,AEQVDGVINLGNSLIERR,CALVSRGDSGDTLAATQSLLK,VGFTNSFFGN,SRVLPELEEIR,CALVSRGDSGDTL,SQPAGYDYVGFTNSFFGN,FQSADATGQELLDGNHEASEEIR,VIALYDFEAR,AEQVDGVINLGNSLIER,GRSQPAGYDYVGFTNSFFGN,SRVLPELEEIREAR,HESFVSEVQAK,PRGRSQPAGYDYVGFTNSFFGN,LSEIAELKDQLVAGEHSQAK
79	gi|26348307|dbj|BAC37793.1| unnamed protein product	IPI00856263.1|TREMBL:Q8BJT2|VEGA:OTTMUSP00000026791;OTTMUSP00000026792	30990.4	5.63	5.69	4	0	10	YFDRVDENNPEYLR,YFDRVDENNPEYLRER
80	Glutamine synthetase OS=Mus musculus GN=Glul PE=1 SV=6	IPI00626790.3|SWISS-PROT:P15105|ENSEMBL:ENSMUSP00000083375|REFSEQ:NP_032157|VEGA:OTTMUSP00000017702	42119.7	6.64	7.51	1	1	1	GGLDNARRLTGFHETSNINDFSAGVANR
81	Hemoglobin subunit alpha OS=Mus musculus GN=Hba PE=1 SV=2	IPI00469114.5|SWISS-PROT:P01942|TREMBL:A8DUV3	15085.2	7.97	70.42	49	11	276	FTPAVHASLDKFLASVSTVLTSKYR,LLVTLASHHPADFTPAVHASLDKFLASVSTVLTSKYR,IGGHGAEYGAEALER,VHASLDKFLASVSTVLTSKYR,SVSTVLTSKYR,HPADFTPAVHASLDKFLASVSTVLTSKYR,ASLDKFLASVSTVLTSKYR,TPAVHASLDKFLASVSTVLTSKYR,LRVDPVNFK,HHPADFTPAVHASLDKFLASVSTVLTSKYR,PAVHASLDKFLASVSTVLTSKYR,TVLTSKYR,LVTLASHHPADFTPAVHASLDKFLASVSTVLTSKYR,LDKFLASVSTVLTSKYR,LASVSTVLTSKYR,DKFLASVSTVLTSKYR,KFLASVSTVLTSKYR,SLDKFLASVSTVLTSKYR,ASHHPADFTPAVHAS…
81	gi|123276283|emb|CAM22512.1| hemoglobin alpha, adult chain 1	IPI00845802.1|TREMBL:A8DUV1;Q61287;Q61649;Q8BPF4;Q91VB8;Q9CWS5;Q9CY06;Q9QWJ3|ENSEMBL:ENSMUSP00000090895;ENSMUSP00000090897|REFSEQ:NP_001077424;NP_032244|VEGA:OTTMUSP00000005552;OTTMUSP00000005553	15112.2	7.97	70.42	49	11	276	FTPAVHASLDKFLASVSTVLTSKYR,LLVTLASHHPADFTPAVHASLDKFLASVSTVLTSKYR,IGGHGAEYGAEALER,VHASLDKFLASVSTVLTSKYR,SVSTVLTSKYR,HPADFTPAVHASLDKFLASVSTVLTSKYR,ASLDKFLASVSTVLTSKYR,TPAVHASLDKFLASVSTVLTSKYR,LRVDPVNFK,HHPADFTPAVHASLDKFLASVSTVLTSKYR,PAVHASLDKFLASVSTVLTSKYR,TVLTSKYR,LVTLASHHPADFTPAVHASLDKFLASVSTVLTSKYR,LDKFLASVSTVLTSKYR,LASVSTVLTSKYR,DKFLASVSTVLTSKYR,KFLASVSTVLTSKYR,SLDKFLASVSTVLTSKYR,ASHHPADFTPAVHAS…
82	Basigin OS=Mus musculus GN=Bsg PE=1 SV=2	IPI00408495.1|SWISS-PROT:P18572-1|ENSEMBL:ENSMUSP00000070751|REFSEQ:NP_033898	42444.7	5.56	13.11	8	0	30	SGEYSCIFLPEPVGRSEINVEGPPRIK,SEINVEGPPRIK,GGKVLQEDTLPDLHTKYIVDADDR,SGEYSCIFLPEPVGR
82	gi|2808470|emb|CAA76141.1| basigin	IPI00462199.1|TREMBL:O55107	30273.9	5.15	18.55	8	0	30	SGEYSCIFLPEPVGRSEINVEGPPRIK,SEINVEGPPRIK,GGKVLQEDTLPDLHTKYIVDADDR,SGEYSCIFLPEPVGR
83	gi|215273642|dbj|BAG84705.1| protein 4.1R	IPI00921639.1|TREMBL:B6ZHC3	19871.2	5.17	19.57	3	0	13	TQTVTISDTANAVK,SVTKVVVHQETEISEE,EQHPDMSVTKVVVHQETEISEE
83	gi|74225627|dbj|BAE21657.1| unnamed protein product	IPI00650000.2|TREMBL:A2A834;Q3V048|VEGA:OTTMUSP00000010971	18728.8	4.79	20.93	3	0	13	TQTVTISDTANAVK,SVTKVVVHQETEISEE,EQHPDMSVTKVVVHQETEISEE
83	Epb4.1 Erythrocyte protein band 4.1	IPI00648159.1|TREMBL:A2A844;Q3U0G7|VEGA:OTTMUSP00000010972	20935	4.39	18.27	3	0	13	TQTVTISDTANAVK,SVTKVVVHQETEISEE,EQHPDMSVTKVVVHQETEISEE
84	Ank1 Isoform 5 of Ankyrin-1	IPI00755395.1|SWISS-PROT:Q02357-5|ENSEMBL:ENSMUSP00000106316|VEGA:OTTMUSP00000032485	192033	7.85	23.74	69	0	243	VLLQNDPNPDVLSK,DDQTPLHCAAR,EGHVDTALALLEKEASQACMTK,NGHVRISEILLDHGAPIQAKTK,NDDTRTAAVLLQNDPNPDVLSK,LQNDPNPDVLSK,LLLENGASPNLATTAGHTPLHTAAR,TTAGHTPLHTAAR,SPNLATTAGHTPLHTAAR,LLENGASPNLATTAGHTPLHTAAR,DELTPLHCAAR,AKDDQTPLHCAAR,NGHVRISEILLDHGAPIQAK,EGHVDTALALLEK,AGHTEVAKYLLQNKAK,IGHTGMVKLLLENGASPNLATTAGHTPLHTAAR,TAAVLLQNDPNPDVLSK,PNLATTAGHTPLHTAAR,HVRISEILLDHGAPIQAK,AGHTEVAKYLLQNK,VKLLLENGASPNLATTAGHTPLHT…
85	gi|220941532|emb|CAX15594.1| membrane protein, palmitoylated	IPI00856759.1|TREMBL:B7ZCL8|ENSEMBL:ENSMUSP00000109726|VEGA:OTTMUSP00000026152	49784.3	6.72	13	4	1	17	ESAGLIPSPELQEWR,IAILDIEPQTLKTVR,TAELSPFIVFIAPTDQGTQTEALQQLQK
85	55 kDa erythrocyte membrane protein OS=Mus musculus GN=Mpp1 PE=1 SV=1	IPI00137706.1|SWISS-PROT:P70290|TREMBL:Q542P4;Q684Q6|ENSEMBL:ENSMUSP00000033775|REFSEQ:NP_032647|VEGA:OTTMUSP00000022728	52227.2	6.72	12.45	4	1	17	ESAGLIPSPELQEWR,IAILDIEPQTLKTVR,TAELSPFIVFIAPTDQGTQTEALQQLQK
86	gi|123296392|emb|CAM21327.1| erythrocyte protein band 4.1	IPI00648227.1|TREMBL:A2AD32|VEGA:OTTMUSP00000010391	80350.7	5.55	13.27	12	0	28	QASALIDRPAPHFER,LAPNQTKELEEK,SALIDRPAPHFER,RGEEPAEPAEPEPTEAWK,SLDGAAAAESTDR,SLDGAAAAESTDRSPRPTSAPAIAQSQVTEGPGAPIKK,LDGENIYIR,RGEEPAEPAEPEPTEAWKVEK,SLDGAAAAESTDRSPRPTSAPAIAQSQVTEG
87	Epb4.1 Putative uncharacterized protein	IPI00654038.2|TREMBL:Q3UH12|ENSEMBL:ENSMUSP00000101589	85791.5	5.82	6.42	7	0	17	QASALIDRPAPHFER,LAPNQTKELEEK,SALIDRPAPHFER,RGEEPAEPAEPEPTEAWKDLDK,RGEEPAEPAEPEPTEAWK
88	gi|148679288|gb|EDL11235.1| mCG142671, isoform CRA_b	IPI00381029.1|TREMBL:Q6PDB7|ENSEMBL:ENSMUSP00000063005|REFSEQ:NP_937814|VEGA:OTTMUSP00000034291	61927.1	5.69	6.12	1	1	4	AGVHTFLGIPFAKPPVGPLRFAPPEAPEPWSGVR
88	- 62 kDa protein	IPI00624258.1|ENSEMBL:ENSMUSP00000036258	62269.4	5.53	6.09	1	1	4	AGVHTFLGIPFAKPPVGPLRFAPPEAPEPWSGVR
88	gi|15929734|gb|AAH15290.1| Carboxylesterase 2	IPI00128121.1|TREMBL:Q80VX3;Q8K033;Q91WG0|ENSEMBL:ENSMUSP00000058567|REFSEQ:NP_663578|VEGA:OTTMUSP00000034289	62469.6	5.39	6.06	1	1	4	AGVHTFLGIPFAKPPVGPLRFAPPEAPEPWSGVR
89	Beta-actin-like protein 2 OS=Mus musculus GN=Actbl2 PE=1 SV=1	IPI00221528.1|SWISS-PROT:Q8BFZ3|ENSEMBL:ENSMUSP00000052086|REFSEQ:NP_780706	42004.2	5.3	6.65	2	0	5	SYELPDGQVITIGNER,LTEAPLNPK
90	Ank1 Isoform 6 of Ankyrin-1	IPI00755993.1|SWISS-PROT:Q02357-6|ENSEMBL:ENSMUSP00000072612;ENSMUSP00000113571|REFSEQ:NP_001104253|VEGA:OTTMUSP00000032484	209548	6.27	24.65	75	0	261	VLLQNDPNPDVLSK,DDQTPLHCAAR,EGHVDTALALLEKEASQACMTK,NGHVRISEILLDHGAPIQAKTK,NDDTRTAAVLLQNDPNPDVLSK,LQNDPNPDVLSK,LLLENGASPNLATTAGHTPLHTAAR,TTAGHTPLHTAAR,SPNLATTAGHTPLHTAAR,LLENGASPNLATTAGHTPLHTAAR,DELTPLHCAAR,AKDDQTPLHCAAR,NGHVRISEILLDHGAPIQAK,EGHVDTALALLEK,AGHTEVAKYLLQNKAK,IGHTGMVKLLLENGASPNLATTAGHTPLHTAAR,TAAVLLQNDPNPDVLSK,PNLATTAGHTPLHTAAR,HVRISEILLDHGAPIQAK,AGHTEVAKYLLQNK,VKLLLENGASPNLATTAGHTPLHT…
90	Ank1 207 kDa protein	IPI00881427.1|ENSEMBL:ENSMUSP00000113495|VEGA:OTTMUSP00000032486	206911	6.17	24.96	75	0	261	VLLQNDPNPDVLSK,DDQTPLHCAAR,EGHVDTALALLEKEASQACMTK,NGHVRISEILLDHGAPIQAKTK,NDDTRTAAVLLQNDPNPDVLSK,LQNDPNPDVLSK,LLLENGASPNLATTAGHTPLHTAAR,TTAGHTPLHTAAR,SPNLATTAGHTPLHTAAR,LLENGASPNLATTAGHTPLHTAAR,DELTPLHCAAR,AKDDQTPLHCAAR,NGHVRISEILLDHGAPIQAK,EGHVDTALALLEK,AGHTEVAKYLLQNKAK,IGHTGMVKLLLENGASPNLATTAGHTPLHTAAR,TAAVLLQNDPNPDVLSK,PNLATTAGHTPLHTAAR,HVRISEILLDHGAPIQAK,AGHTEVAKYLLQNK,VKLLLENGASPNLATTAGHTPLHT…
90	Ank1 206 kDa protein	IPI00882025.1|ENSEMBL:ENSMUSP00000112850|VEGA:OTTMUSP00000032482	205853	6.1	25.03	75	0	261	VLLQNDPNPDVLSK,DDQTPLHCAAR,EGHVDTALALLEKEASQACMTK,NGHVRISEILLDHGAPIQAKTK,NDDTRTAAVLLQNDPNPDVLSK,LQNDPNPDVLSK,LLLENGASPNLATTAGHTPLHTAAR,TTAGHTPLHTAAR,SPNLATTAGHTPLHTAAR,LLENGASPNLATTAGHTPLHTAAR,DELTPLHCAAR,AKDDQTPLHCAAR,NGHVRISEILLDHGAPIQAK,EGHVDTALALLEK,AGHTEVAKYLLQNKAK,IGHTGMVKLLLENGASPNLATTAGHTPLHTAAR,TAAVLLQNDPNPDVLSK,PNLATTAGHTPLHTAAR,HVRISEILLDHGAPIQAK,AGHTEVAKYLLQNK,VKLLLENGASPNLATTAGHTPLHT…
91	gi|6425087|gb|AAF08293.1|AF195094_1 gamma actin-like protein	IPI00136929.1|TREMBL:Q9QZ83|ENSEMBL:ENSMUSP00000101823	43600.8	5.11	11.45	6	0	16	SYELPDGQVITIGNER,VAPEEHPVLLTEAPLNPK,LTEAPLNPK,DSYVGDEAQSK
n = 3 Hem1-/- mice (8 technical replicates).
