# Supplementary material for: Hematopoietic Protein-1 Regulates the Actin Membrane Skeleton and Membrane Stability in Murine Erythrocytes
Source: PLoS One. 2013 Feb 12;8(2):e54902. doi: 10.1371/journal.pone.0054902 (PMC3570531; doi:10.1371/journal.pone.0054902)
Supplement: Table S6 — Peptide differences in WT and Hem1−/− erythrocyte soluble fraction detected by CrawDad. (XLS) [file pone.0054902.s006.xls]

## Sheet: soluble fraction
Table S6. Peptide differences in WT and Hem1-/- erythrocyte soluble fraction detected by CrawDad.
Up group	Protein	ID	Intensity difference	SD	Peptide
wt	Hbb-b1 Beta-globin	IPI00762198.2	275.88	260.19	YFDSFGDLSSASAIMGNAK
					VITAFNDGLNHLDSLK
					LLVVYPWTQR
					AAVSGLWGK
					YFDSFGDLSSASAIMGN
wt	Ostf1 Osteoclast-stimulating factor 1	IPI00125923.1	66.45	63.65	GYADIVQLLLAK
					DIVEVLFTQPNVELNQQNK
					TGLIPSNYVAEQAESIDNPLHEAAK
wt	Psmb1 Proteasome subunit beta type-1	IPI00113845.1	54.11	51.5	AGGSASAMLQPLLDNQVGFK
					FFPYYVYNIIGGLDEEGK
					NMQNVEHVPLTLDR
wt	Eef1a2 Elongation factor 1-alpha 2	IPI00119667.1	28.98	11.94	IGGIGTVPVGR
					LPLQDVYK
wt	Vcl Vinculin	IPI00405227.3	25.24	6.36	VLQLTSWDEDAWASK
					TNISDEESEQATEMLVHNAQNLMQSVK
wt	Apoa1bp Apolipoprotein A-I-binding protein	IPI00170307.1	24.19	18.03	GNPSGIQPDLLISLTAPK
					RPNKPLFTGLVTQCQK
wt	Sp9;Scrn3 Secernin 3, isoform CRA_b	IPI00756194.1	18.76	11.03	LFDEVQEVIYCPAAVHNDLEK
					ALDVIVDLLEK
					EFSYYNSFLIADR
wt	Ankyrin 1	IPI00874807.1	16.9	15.88	TGFTPLHIAAHYENLNVAQLLLNR
					ELQFSVEDINR
					SGLTPLHLVSQEGHVPVADVLIK
					GGSPHSPAWNGYTPLHIAAK
					LLGNQATFSPIVTVEPR
wt	Pdcd5;100042424 Programmed cell death protein 5	IPI00116120.3	14.24	8.88	VSEQGLIEILEK
					NSILAQVLDQSAR
					LSNLALVKPEK
wt	Eif6 Eukaryotic translation initiation factor 6	IPI00115862.1	12.63	9.45	ETEEILADVLK
					QTVADQVLVGSYCVFSNQGGLVHPK
					DSLIDSLT
					LSALGNVTTCNDYVALVHPDLDR
wt	Ube2r2 Ubiquitin-conjugating enzyme E2 R2	IPI00420771.5	12.1	9.42	FPIDYPYSPPTFR
					VPTTLAEYCIK
wt	Dnpep aspartyl aminopeptidase isoform a	IPI00331394.3	11.89	17.73	NINENFGPNTEIHLVPILATAVQEELEK
					EVAGQVGVPLQDLMVR
					ETEGWDIVPENK
					GFFELFPSVSR
					LDNLHSCFCALQALIDSCASPASLAR
wt	Eno2 Gamma-enolase	IPI00331704.7	11.31	5.26	FGANAILGVSLAVCK
					SGETEDTFIADLVVGLCTGQIK
wt	Ppp2r4 Serine/threonine-protein phosphatase 2A regulatory subunit B'	IPI00118723.3	11.14	9.81	LVALLDTLDR
					IDYGTGHEAAFAAFLCCLCK
					FGSLLPIHPVTSG
					TGPFAEHSNQLWNISAVPSWSK
wt	Epb4.1 Erythrocyte protein band 4.1	IPI00649005.1	10.71	4.56	IVITGDADIDHDQVLVQAIK
					FYPPDPAQLTEDITR
wt	Ywhae 14-3-3 protein epsilon	IPI00118384.1	10.19	9.81	LICCDILDVLDK
					DSTLIMQLLR
wt	Ranbp1 Ran-specific GTPase-activating protein		9.97	9.22	ADFADECPKPELLAIR
					AWVWNTHADFADECPKPELLAIR
					FASENDLPEWK
wt	Cmpk1 UMP-CMP kinase	IPI00331146.5	9.59	4.84	SVDEVFGEVVK
					IQTYLESTKPIIDLYEEMGK
wt	Dpp3 Dipeptidyl-peptidase 3	IPI00116134.1	9.54	5.23	NVSLGNVLAVAYAAK
					FPEDGPELEEVLIQLAAADAR
					LEGSEVQLVEYEASAAGLIR
wt	Pgp Phosphoglycolate phosphatase		9.26	5.59	FIFDCVSQEYGINPER
		IPI00380195.1			TILTLTGVSSLEDVK
wt	Cfl1 Cofilin-1	IPI00890117.1	8.26	5.97	EILVGDVGQTVDDPYTTFVK
					LGGSAVISLEGKPL
wt	Pgk1 Phosphoglycerate kinase 1	IPI00555069.3	8.08	5.49	TGQATVASGIPAGWMGLDCGTESSK
					ALESPERPFLAILGGAK
					SLMDEVVK
					DCVGPEVENACANPAAGTVILLENLR
					ITLPVDFVTADK
wt	Akr1b3 Aldose reductase	IPI00223757.4	7.85	5.55	MPTLGLGTWK
					VAIDLGYR
wt	Hagh Hydroxyacylglutathione hydrolase	IPI00115866.2	7.77	5.44	VYCGHEYTVNNLK
					YAIGEPTVPSTLAEEFTYNPF
wt	LOC677344 similar to S-adenosylhomocysteine hydrolase	IPI00758028.2	7.7	2.73	ALDIAENEMPGLMR
					GETDEEYLWCIEQTLHFK
wt	Gpx4 Phospholipid hydroperoxide glutathione peroxidase	IPI00463220.2	7.6	4.79	ICVNGDDAHPLWK
					ILAFPCNQFGR
wt	Pts 6-pyruvoyl tetrahydrobiopterin synthase	IPI00154100.2	7.4	4.81	VVVTVHGEIDPVTGMVMNLTDLK
					VFETDNNIVVYK
wt	Ppp2r1a Serine/threonine-protein phosphatase 2A 65 kDa regulatory subunit A alpha isoform	IPI00310091.8	7.06	3.63	LNIISNLDCVNEVIGIR
					IGPILDNSTLQSEVKPILEK
wt	Park7 Parkinson disease (Autosomal recessive, early onset) 7	IPI00649794.1	6.95	2.67	TQGPYDVVVLPGGNLGAQNLSESPMVK
					GLIAAICAGPTALLAHEVGFGCK
wt	OTTMUSG00000014946 hypothetical protein	IPI00762304.1	6.74	6.46	GLMTTVHAITATQK
					VIISAPSADAPMFVMGVNHEK
					VIHDNFGIVEGLMTTVHAITATQK
					VVDLMAYMASK
					EGLMTTVHAITATQK
					VEGLMTTVHAITATQK
					VGVNGFGR
					VVDLMAYMASKE
wt	Aldh9a1 aldehyde dehydrogenase 9, subfamily A1	IPI00124372.3	6.48	1.77	AGAPPGLFNVVQGGAATGQFLCHHR
					LGDPLLEDTR
wt	Otub1;LOC100046081 Ubiquitin thioesterase OTUB1	IPI00154004.1	6.46	3.21	AFGFSHLEALLDDSK
					FFEHFIEGGR
wt	Atp6v1b2 V-type proton ATPase subunit B, brain isoform	IPI00119113.3	6.44	3.99	IYPEEMIQTGISAIDGMNSIAR
					IPIFSAAGLPHNEIAAQICR
wt	Rnh1 Ribonuclease inhibitor	IPI00313296.3	6.35	3.19	DISSAVQANPALTELSLR
					ASLQELDLSSNK
					TNELGDGGVGLVLQGLQNPTCK
wt	Psma2 Proteasome subunit alpha type	IPI00420745.7	6.34	4.27	LVQIEYALAAVAGGAPSVGIK
					GYSFSLTTFSPSGK
					LAQQYYLVYQEPIPTAQLVQR
wt	Txn1 Thioredoxin	IPI00226993.5	6.21	0.69	MIKPFFHSLCDK
					LVVVDFSATWCGPCK
wt	Psmc3 Proteasome (Prosome, macropain) 26S subunit ATPase 3	IPI00758064.1	6.19	1.81	APSIIFIDELDAIGTK
					QIQELVEAIVLPMNHK
					MNVSPDVNYEELAR
wt	Psmb4 Proteasome subunit beta type-4	IPI00129512.3	6.06	3.32	GVEIEGPLSAQTNWDIAHMISGFE
					VNDSTMLGASGDYADFQYLK
					GVEIEGPLSAQTNWDIAH
					QVLGQMVIDEELLGDGHSYSPR
wt	Msn Moesin	IPI00110588.4	5.96	0.89	FYPEDVSEELIQDITQR
					EGILNDDIYCPPETAVLLASYAVQSK
					IGFPWSEIR
wt	Gclm Glutamate--cysteine ligase regulatory subunit	IPI00114329.1	5.77	1.59	LFIVGSNSSSSTR
					TLNEWSSQISPDLVR
wt	Prdx6-rs1 Peroxiredoxin 6, related sequence 1	IPI00221454.1	5.69	0.27	DFTPVCTTELGR
					LPFPIIDDK
wt	LOC100048075 similar to nonselenium glutathione peroxidase	IPI00756385.1	5.62	0.84	DFTPVCTTELGR
					SIDSVEDHLAWSK
					PGGLLLGDEAPNFEANTTIGR
wt	Prdx6 Peroxiredoxin-6	IPI00555059.2	5.6	0.83	DFTPVCTTELGR
					SIDSVEDHLAWSK
					LPFPIIDDK
					PGGLLLGDEAPNFEANTTIGR
wt	Hspa2 heat shock protein 2	IPI00387494.1	5.47	1.23	FEELNADLFR
					IINEPTAAAIAYGLDK
wt	Slc4a1 Isoform Erythrocyte of Band 3 anion transport protein	IPI00120761.3	5.4	1.7	NQELQWVEAAHWIGLEENLR
					YLPSPAKPDPNLYNTLDLNGGK
					IPPDSETTLVLVGR
					ANFLEKPVLGFVR
wt	Psmc5 26S protease regulatory subunit 8	IPI00135640.1	5.27	0.5	IEELQLIVNDK
					GVCTEAGMYALR
wt	Bpgm Bisphosphoglycerate mutase	IPI00221663.5	5.22	1.55	AVGPHQFLGNQEAIQAAIK
					FCSWVDQK
wt	Rasl2-9 GTP-binding nuclear protein Ran, testis-specific isoform	IPI00126133.1	4.99	1	VCENIPIVLCGNK
					CAIIMFDVTSR
wt	Ywhaz 14-3-3 protein zeta/delta	IPI00116498.1	4.74	1.7	DSTLIMQLLR
					FLIPNASQPESK
wt	Psma6 Proteasome subunit alpha type-6	IPI00131845.1	4.73	7.96	AINQGGLTSVAVR
					ILTEAEIDAHLVALAER
					LYQVEYAFK
					YGYEIPVDMLCK
wt	Hba-a2;Hba-a1 hemoglobin alpha, adult chain 2	IPI00845802.1	4.7	4.82	MFASFPTTK
					SALSDLHAHK
					PGALSALSDLHAHK
					GALSALSDLHAHK
					VADALANAAGHLDDLPGALSALSDLHAHK
					KVADALANAAGHLDDLPGALSALSDLHAH
					FPHFDVSHGSAQVK
					IGGHGAEYGAEALER
					TYFPHFDVSHGSAQVK
					YFPHFDVSHGSAQVK
					PHFDVSHGSAQVK
wt	Ppa1 Inorganic pyrophosphatase	IPI00110684.1	4.68	1.63	VIAINVDDPDAANYK
					GQYISPFHDVPIYADK
wt	Psma7 Proteasome subunit alpha type-7	IPI00131406.1	4.6	2.56	LTVEDPVTVEYITR
					AITVFSPDGHLFQVEYAQEAVK
wt	Capza1 F-actin capping protein alpha-1 subunit	IPI00877182.1	4.58	0.82	IEGYDDQVLITEHGDLGNSR
					FITHAPPGEFNEVFNDVR
wt	Cyb5r3 Isoform 1 of NADH-cytochrome b5 reductase 3	IPI00121079.3	4.57	1.49	DHLPTPGEEPLILMCGPPPMIQF
					DHLPTPGEEPLILMCGPPPMIQFACLPNLER
					FALPSPQHILGLPIGQHIYLSTR
					STPAITLENPDIK
					SVGMIAGGTGITPMLQVIR
wt	Spnb1 spectrin beta 1	IPI00131376.5	4.48	3.71	ELHLLGVQVQQFQDVATR
					LEGLDTDWDALR
					TLMAQIDGVNLAANNLVESGHPR
					LGHLQSSWDTLR
					LLTSPDVSYDEAR
					GNTLTQCLGFQEFQK
wt	Psma4 Proteasome subunit alpha type-4	IPI00277001.4	4.4	3.09	LLDEVFFSEK
					LNEDMACSVAGITSDANVLTNELR
					VEIATLTR
wt	Psmb2 Proteasome subunit beta type-2	IPI00128945.1	4.29	1.2	FILNLPTFSVR
				1.2	NLADCLR
wt	Hebp1 Heme-binding protein 1	IPI00135085.4	4.19	0.72	GVGMGMTVPVSFAVFPNEDGSLQK
					NSLFGSVETWPWQVLSTGGK
wt	Psmb6 Proteasome subunit beta type-6	IPI00119239.2	4.08	1.3	LTPIHDHIFCCR
					SIELNEPPLVHTAASLFK
wt	Glo1 Lactoylglutathione lyase	IPI00321734.7	3.96	3.18	TAWTFSR
					IGIAVPDVYSACK
					FEELGVK
					SLDFYTR
					ATLELTHNWGTEDDETQSYHNGNSDPR
wt	Car1 10 kDa protein	IPI00881642.1	3.77	3.34	YSGELHLVH
					YSGELHLVH
					YSSASEAISK
					YSSASEAISK
wt	Eif5a2 Eukaryotic translation initiation factor 5A-2	IPI00331514.6	3.17	0.55	VHLVGIDIFTGK
					YEDICPSTHNMDVPNIK
wt	Ppp1r7 Protein phosphatase 1 regulatory subunit 7	IPI00129319.3	3.01	1.36	LQNLDALTNLTVLSVQSNR
					IENISNLHQLQMLELGSNR
wt	Pcmt1 Isoform 1 of Protein-L-isoaspartate(D-aspartate) O-methyltransferase	IPI00329913.8	2.83	0.27	VFEVMLATDR
					ALDVGSGSGILTACFAR
hem1	Kpnb1 karyopherin (importin) beta 1	IPI00742334.1	51.72	47.14	GALQYLVPILTQTLTK
					SDFDMVDYLNELR
					AAVENLPTFLVELSR
					SNEILTAIIQGMR
hem1	Ppp2cb Serine/threonine-protein phosphatase 2A catalytic subunit beta isoform	IPI00111556.1	45.95	29.86	YSFLQFDPAPR
					QITQVYGFYDECLR
					GAGYTFGQDISETFNHANGLTLVSR
hem1	Ppp2ca Serine/threonine-protein phosphatase 2A catalytic subunit alpha isoform	IPI00120374.1	43.36	30.27	YSFLQFDPAPR
					ELDQWIEQLNECK
					QITQVYGFYDECLR
					GAGYTFGQDISETFNHANGLTLVSR
hem1	Actb Actin, cytoplasmic 1	IPI00110850.1	16.17	13.21	TTGIVMDSGDGVTHTVPIYEGYALPHAILR
					VAPEEHPVLLTEAPLNPK
					TTGIVMDSGDGVTHTVPIYEGYALPH
					SYELPDGQVITIGNER
					DSYVGDEAQSK
hem1	Gart phosphoribosylglycinamide formyltransferase	IPI00230612.3	8.32	3.22	IELVVVGPEAPLAAGIVGDLTSAGVR
					GVEITGFPEAQALGLQVFHAGTALK
hem1	Prdx1 Peroxiredoxin 1	IPI00648615.3	8.13	3.85	QGGLGPMNIPLISDPK
					LNCQVIGASVDSHFCHLAWINTPK
hem1	Glod4 Isoform 1 of Glyoxalase domain-containing protein 4	IPI00110721.5	6.47	3.56	ESHSILTPLVSLDTPGK
					LGNDFMGITLASSQAVSNAR
hem1	Usp14 Ubiquitin carboxyl-terminal hydrolase 14	IPI00270877.5	5.37	1.2	CTESEEEEVTK
					YEPFSFADDIGSNNCGYYDLQAVLTHQGR
hem1	Rabif Guanine nucleotide exchange factor MSS4	IPI00128561.1	5.27	2.58	VLQPGTALFSR
					FLVCADCEIGPIGWHCLDDK
hem1	Rad23a Putative uncharacterized protein	IPI00830250.1	4.45	0.63	QVIQQNPALLPALLQQLGQENPQLLQQISR
					AGQGIPAPPEASPTAVPEPSTPFPPVLASGMSHPPPTSR
hem1	Eif5;LOC100047658 Eukaryotic translation initiation factor 5	IPI00187443.1	4.11	3.04	GLTLSDDLER
					LQDMLDGFIK
hem1	Car1 10 kDa protein	IPI00881642.1	3.77	3.34	YSGELHLVHWNSAK
					SGELHLVHWNSAK
					LTQFHFHWGNSNDHGSEHTVDGTR
					YSGELHLVHWN
					ADGLAILGVLMK
					YSGELHLVH
					YSSASEAISK
hem1	Gstp1 Glutathione S-transferase P 1	IPI00555023.2	2.33	3.93	PPYTIVYFPVR
					EEVVTIDTWMQGLLKPTCLYGQLPK
					EAAQMDMVNDGVEDLR
n = 2 WT mice (4 technical replicates) and 2 Hem1-/- mice (4 technical replicates). p = 0.05.
